# Supplementary material
Source: publisher figshare collection journal article supplement (https://acs.figshare.com/ndownloader/files/3982447)
Supplement: Supplementary file 1 [file 3982447]

  
data_db11b 
  
_audit_creation_method            SHELXL-97 
_chemical_name_systematic 
; 
 ? 
; 
_chemical_name_common             ? 
_chemical_melting_point           ? 
_chemical_formula_moiety          ? 
_chemical_formula_sum 
 'C34 H55 N2 Ni Si2' 
_chemical_formula_weight          606.69 
  
loop_ 
 _atom_type_symbol 
 _atom_type_description 
 _atom_type_scat_dispersion_real 
 _atom_type_scat_dispersion_imag 
 _atom_type_scat_source 
 'C'  'C'   0.0033   0.0016 
 'International Tables Vol C Tables 4.2.6.8 and 6.1.1.4' 
 'H'  'H'   0.0000   0.0000 
 'International Tables Vol C Tables 4.2.6.8 and 6.1.1.4' 
 'N'  'N'   0.0061   0.0033 
 'International Tables Vol C Tables 4.2.6.8 and 6.1.1.4' 
 'Si'  'Si'   0.0817   0.0704 
 'International Tables Vol C Tables 4.2.6.8 and 6.1.1.4' 
 'Ni'  'Ni'   0.3393   1.1124 
 'International Tables Vol C Tables 4.2.6.8 and 6.1.1.4' 
  
_symmetry_cell_setting            orthorhombic 
_symmetry_space_group_name_H-M    Pbca 
  
loop_ 
 _symmetry_equiv_pos_as_xyz 
 'x, y, z' 
 '-x+1/2, -y, z+1/2' 
 '-x, y+1/2, -z+1/2' 
 'x+1/2, -y+1/2, -z' 
 '-x, -y, -z' 
 'x-1/2, y, -z-1/2' 
 'x, -y-1/2, z-1/2' 
 '-x-1/2, y-1/2, z' 
  
_cell_length_a                    20.346(2) 
_cell_length_b                    15.4644(16) 
_cell_length_c                    23.164(2) 
_cell_angle_alpha                 90.00 
_cell_angle_beta                  90.00 
_cell_angle_gamma                 90.00 
_cell_volume                      7288.2(13) 
_cell_formula_units_Z             8 
_cell_measurement_temperature     100(2) 
_cell_measurement_reflns_used     ? 
_cell_measurement_theta_min       ? 
_cell_measurement_theta_max       ? 
  
_exptl_crystal_description        block 
_exptl_crystal_colour             yellow 
_exptl_crystal_size_max           0.6 
_exptl_crystal_size_mid           0.2 
_exptl_crystal_size_min           0.2 
_exptl_crystal_density_meas       ? 
_exptl_crystal_density_diffrn     1.106 
_exptl_crystal_density_method     'not measured' 
_exptl_crystal_F_000              2632 
_exptl_absorpt_coefficient_mu     0.621 
_exptl_absorpt_correction_type    none 
_exptl_absorpt_correction_T_min   0.1666 
_exptl_absorpt_correction_T_max   0.3142 
_exptl_absorpt_process_details    ? 
  
_exptl_special_details 
; 
 ? 
; 
  
_diffrn_ambient_temperature       100(2) 
_diffrn_radiation_wavelength      0.71073 
_diffrn_radiation_type            MoK\a 
_diffrn_radiation_source          'fine-focus sealed tube' 
_diffrn_radiation_monochromator   graphite 
_diffrn_measurement_device_type   'Bruker P4' 
_diffrn_measurement_method        '\w scans' 
_diffrn_detector_area_resol_mean  ? 
_diffrn_standards_number          ? 
_diffrn_standards_interval_count  ? 
_diffrn_standards_interval_time   ? 
_diffrn_standards_decay_%         ? 
_diffrn_reflns_number             36907 
_diffrn_reflns_av_R_equivalents   0.0697 
_diffrn_reflns_av_sigmaI/netI     0.0443 
_diffrn_reflns_limit_h_min        -24 
_diffrn_reflns_limit_h_max        20 
_diffrn_reflns_limit_k_min        -17 
_diffrn_reflns_limit_k_max        18 
_diffrn_reflns_limit_l_min        -22 
_diffrn_reflns_limit_l_max        27 
_diffrn_reflns_theta_min          1.76 
_diffrn_reflns_theta_max          25.00 
_reflns_number_total              6412 
_reflns_number_gt                 5168 
_reflns_threshold_expression      >2sigma(I) 
  
_computing_data_collection        'Bruker XSCANS' 
_computing_cell_refinement        'Bruker XSCANS' 
_computing_data_reduction         'Bruker SHELXTL' 
_computing_structure_solution     'SHELXS-97 (Sheldrick, 1990)' 
_computing_structure_refinement   'SHELXL-97 (Sheldrick, 1997)' 
_computing_molecular_graphics     'Bruker SHELXTL' 
_computing_publication_material   'Bruker SHELXTL' 
  
_refine_special_details 
; 
 Refinement of F^2^ against ALL reflections.  The weighted R-factor wR and 
 goodness of fit S are based on F^2^, conventional R-factors R are based 
 on F, with F set to zero for negative F^2^. The threshold expression of 
 F^2^ > 2sigma(F^2^) is used only for calculating R-factors(gt) etc. and is 
 not relevant to the choice of reflections for refinement.  R-factors based 
 on F^2^ are statistically about twice as large as those based on F, and R- 
 factors based on ALL data will be even larger. 
; 
  
_refine_ls_structure_factor_coef  Fsqd 
_refine_ls_matrix_type            full 
_refine_ls_weighting_scheme       calc 
_refine_ls_weighting_details 
 'calc w=1/[\s^2^(Fo^2^)+(0.0725P)^2^+0.0000P] where P=(Fo^2^+2Fc^2^)/3' 
_atom_sites_solution_primary      direct 
_atom_sites_solution_secondary    difmap 
_atom_sites_solution_hydrogens    geom 
_refine_ls_hydrogen_treatment     mixed 
_refine_ls_extinction_method      none 
_refine_ls_extinction_coef        ? 
_refine_ls_number_reflns          6412 
_refine_ls_number_parameters      370 
_refine_ls_number_restraints      0 
_refine_ls_R_factor_all           0.0525 
_refine_ls_R_factor_gt            0.0430 
_refine_ls_wR_factor_ref          0.1168 
_refine_ls_wR_factor_gt           0.1126 
_refine_ls_goodness_of_fit_ref    1.021 
_refine_ls_restrained_S_all       1.021 
_refine_ls_shift/su_max           0.000 
_refine_ls_shift/su_mean          0.000 
  
loop_ 
 _atom_site_label 
 _atom_site_type_symbol 
 _atom_site_fract_x 
 _atom_site_fract_y 
 _atom_site_fract_z 
 _atom_site_U_iso_or_equiv 
 _atom_site_adp_type 
 _atom_site_occupancy 
 _atom_site_symmetry_multiplicity 
 _atom_site_calc_flag 
 _atom_site_refinement_flags 
 _atom_site_disorder_assembly 
 _atom_site_disorder_group 
Ni1 Ni 0.032613(13) 0.310251(18) 0.121523(12) 0.02228(12) Uani 1 1 d . . . 
Si2 Si -0.07867(3) 0.35400(4) 0.21248(3) 0.02557(17) Uani 1 1 d . . . 
Si1 Si -0.11320(3) 0.26542(5) 0.09107(3) 0.02813(18) Uani 1 1 d . . . 
N1 N 0.17533(9) 0.32169(11) 0.14119(8) 0.0215(4) Uani 1 1 d . . . 
C1 C 0.12432(11) 0.29617(14) 0.10670(10) 0.0209(5) Uani 1 1 d . . . 
N2 N 0.15579(9) 0.26375(12) 0.05927(8) 0.0224(4) Uani 1 1 d . . . 
C16 C 0.16610(10) 0.30941(15) 0.24551(10) 0.0244(5) Uani 1 1 d . . . 
C21 C 0.12206(11) 0.23225(17) 0.00863(10) 0.0291(6) Uani 1 1 d . . . 
C11 C 0.16699(10) 0.36209(14) 0.19668(9) 0.0215(5) Uani 1 1 d . . . 
C2 C 0.23569(11) 0.30598(14) 0.11574(10) 0.0260(5) Uani 1 1 d . . . 
H2A H 0.2776 0.3186 0.1316 0.031 Uiso 1 1 calc R . . 
C41 C -0.06079(12) 0.33598(17) 0.13530(11) 0.0255(5) Uani 1 1 d . . . 
C22 C 0.10917(11) 0.14375(17) 0.00431(11) 0.0330(6) Uani 1 1 d . . . 
C47 C -0.15917(11) 0.41100(17) 0.22622(12) 0.0362(6) Uani 1 1 d . . . 
H36A H -0.1619 0.4627 0.2018 0.054 Uiso 1 1 calc R . . 
H36B H -0.1617 0.4280 0.2669 0.054 Uiso 1 1 calc R . . 
H36C H -0.1957 0.3720 0.2170 0.054 Uiso 1 1 calc R . . 
C3 C 0.22355(11) 0.26948(15) 0.06428(10) 0.0265(5) Uani 1 1 d . . . 
H3A H 0.2552 0.2512 0.0367 0.032 Uiso 1 1 calc R . . 
C163 C 0.21942(13) 0.17382(17) 0.28462(12) 0.0394(6) Uani 1 1 d . . . 
H16A H 0.2622 0.2022 0.2801 0.059 Uiso 1 1 calc R . . 
H16B H 0.2242 0.1116 0.2777 0.059 Uiso 1 1 calc R . . 
H16C H 0.2031 0.1833 0.3239 0.059 Uiso 1 1 calc R . . 
C44 C -0.20090(12) 0.30356(18) 0.08627(12) 0.0406(7) Uani 1 1 d . . . 
H33A H -0.2178 0.3149 0.1252 0.061 Uiso 1 1 calc R . . 
H33B H -0.2278 0.2589 0.0677 0.061 Uiso 1 1 calc R . . 
H33C H -0.2028 0.3568 0.0634 0.061 Uiso 1 1 calc R . . 
C14 C 0.15416(11) 0.43958(16) 0.30235(10) 0.0298(6) Uani 1 1 d . . . 
H14A H 0.1497 0.4663 0.3391 0.036 Uiso 1 1 calc R . . 
C221 C 0.13182(12) 0.07953(17) 0.04981(12) 0.0397(7) Uani 1 1 d . . . 
H22A H 0.1569 0.1131 0.0794 0.048 Uiso 1 1 calc R . . 
C13 C 0.15499(11) 0.48969(16) 0.25337(11) 0.0295(6) Uani 1 1 d . . . 
H13A H 0.1511 0.5507 0.2567 0.035 Uiso 1 1 calc R . . 
C162 C 0.10268(12) 0.17053(17) 0.24778(12) 0.0360(6) Uani 1 1 d . . . 
H16D H 0.0731 0.1938 0.2182 0.054 Uiso 1 1 calc R . . 
H16E H 0.0851 0.1837 0.2862 0.054 Uiso 1 1 calc R . . 
H16F H 0.1063 0.1077 0.2431 0.054 Uiso 1 1 calc R . . 
C161 C 0.17071(11) 0.21169(15) 0.24124(10) 0.0273(5) Uani 1 1 d . . . 
H16G H 0.1871 0.1974 0.2017 0.033 Uiso 1 1 calc R . . 
C15 C 0.15968(11) 0.35055(16) 0.29871(10) 0.0275(5) Uani 1 1 d . . . 
H15A H 0.1591 0.3170 0.3330 0.033 Uiso 1 1 calc R . . 
C43 C -0.08389(14) 0.2594(2) 0.01418(11) 0.0453(7) Uani 1 1 d . . . 
H32A H -0.0405 0.2320 0.0130 0.068 Uiso 1 1 calc R . . 
H32B H -0.0809 0.3179 -0.0019 0.068 Uiso 1 1 calc R . . 
H32C H -0.1150 0.2251 -0.0087 0.068 Uiso 1 1 calc R . . 
C46 C -0.01503(12) 0.42466(18) 0.24723(11) 0.0385(6) Uani 1 1 d . . . 
H35A H -0.0120 0.4794 0.2261 0.058 Uiso 1 1 calc R . . 
H35B H 0.0277 0.3953 0.2464 0.058 Uiso 1 1 calc R . . 
H35C H -0.0275 0.4361 0.2874 0.058 Uiso 1 1 calc R . . 
C45 C -0.08177(12) 0.25143(18) 0.25558(12) 0.0391(6) Uani 1 1 d . . . 
H34A H -0.0417 0.2178 0.2486 0.059 Uiso 1 1 calc R . . 
H34B H -0.1202 0.2174 0.2439 0.059 Uiso 1 1 calc R . . 
H34C H -0.0850 0.2654 0.2967 0.059 Uiso 1 1 calc R . . 
C12 C 0.16154(11) 0.45238(15) 0.19878(10) 0.0265(5) Uani 1 1 d . . . 
C122 C 0.21310(14) 0.57905(18) 0.14824(13) 0.0482(7) Uani 1 1 d . . . 
H12A H 0.2562 0.5533 0.1558 0.072 Uiso 1 1 calc R . . 
H12B H 0.2019 0.6191 0.1795 0.072 Uiso 1 1 calc R . . 
H12C H 0.2144 0.6105 0.1115 0.072 Uiso 1 1 calc R . . 
C25 C 0.06851(14) 0.2618(2) -0.07990(12) 0.0505(8) Uani 1 1 d . . . 
H25A H 0.0542 0.3011 -0.1089 0.061 Uiso 1 1 calc R . . 
C123 C 0.09296(14) 0.54656(18) 0.13405(12) 0.0440(7) Uani 1 1 d . . . 
H12D H 0.0605 0.5000 0.1314 0.066 Uiso 1 1 calc R . . 
H12E H 0.0934 0.5793 0.0978 0.066 Uiso 1 1 calc R . . 
H12F H 0.0814 0.5853 0.1660 0.066 Uiso 1 1 calc R . . 
C42 C -0.11619(14) 0.15108(18) 0.11843(12) 0.0433(7) Uani 1 1 d . . . 
H31A H -0.1361 0.1502 0.1570 0.065 Uiso 1 1 calc R . . 
H31B H -0.0715 0.1277 0.1205 0.065 Uiso 1 1 calc R . . 
H31C H -0.1426 0.1157 0.0921 0.065 Uiso 1 1 calc R . . 
C121 C 0.16129(13) 0.50770(15) 0.14491(11) 0.0341(6) Uani 1 1 d . . . 
H12G H 0.1724 0.4697 0.1114 0.041 Uiso 1 1 calc R . . 
C24 C 0.05436(14) 0.1750(3) -0.08551(12) 0.0560(9) Uani 1 1 d . . . 
H24A H 0.0301 0.1555 -0.1180 0.067 Uiso 1 1 calc R . . 
C26 C 0.10321(13) 0.29290(19) -0.03281(11) 0.0381(6) Uani 1 1 d . . . 
C23 C 0.07493(12) 0.1164(2) -0.04472(12) 0.0466(8) Uani 1 1 d . . . 
H23A H 0.0658 0.0567 -0.0499 0.056 Uiso 1 1 calc R . . 
C261 C 0.12000(16) 0.38846(19) -0.02725(12) 0.0537(9) Uani 1 1 d . . . 
H26A H 0.1438 0.3947 0.0103 0.064 Uiso 1 1 calc R . . 
C262 C 0.16610(17) 0.4219(2) -0.0729(2) 0.0899(14) Uani 1 1 d . . . 
H26B H 0.1780 0.4819 -0.0641 0.135 Uiso 1 1 calc R . . 
H26C H 0.1444 0.4194 -0.1107 0.135 Uiso 1 1 calc R . . 
H26D H 0.2059 0.3862 -0.0737 0.135 Uiso 1 1 calc R . . 
C222 C 0.07427(19) 0.0381(3) 0.0806(2) 0.1133(19) Uani 1 1 d . . . 
H22B H 0.0906 0.0012 0.1119 0.170 Uiso 1 1 calc R . . 
H22C H 0.0491 0.0030 0.0532 0.170 Uiso 1 1 calc R . . 
H22D H 0.0459 0.0833 0.0967 0.170 Uiso 1 1 calc R . . 
C263 C 0.06168(19) 0.4450(3) -0.0232(2) 0.1106(18) Uani 1 1 d . . . 
H26E H 0.0338 0.4257 0.0088 0.166 Uiso 1 1 calc R . . 
H26F H 0.0368 0.4420 -0.0594 0.166 Uiso 1 1 calc R . . 
H26G H 0.0757 0.5047 -0.0164 0.166 Uiso 1 1 calc R . . 
C223 C 0.1790(2) 0.0132(2) 0.02478(17) 0.0911(14) Uani 1 1 d . . . 
H22E H 0.2147 0.0430 0.0045 0.137 Uiso 1 1 calc R . . 
H22F H 0.1554 -0.0242 -0.0024 0.137 Uiso 1 1 calc R . . 
H22G H 0.1973 -0.0220 0.0561 0.137 Uiso 1 1 calc R . . 
H H -0.0630(13) 0.384(2) 0.1185(11) 0.045(8) Uiso 1 1 d . . . 
  
loop_ 
 _atom_site_aniso_label 
 _atom_site_aniso_U_11 
 _atom_site_aniso_U_22 
 _atom_site_aniso_U_33 
 _atom_site_aniso_U_23 
 _atom_site_aniso_U_13 
 _atom_site_aniso_U_12 
Ni1 0.02042(18) 0.02687(19) 0.01955(19) -0.00177(12) 0.00119(12) -0.00064(11) 
Si2 0.0200(3) 0.0317(4) 0.0251(4) -0.0022(3) 0.0020(3) -0.0003(3) 
Si1 0.0264(3) 0.0355(4) 0.0225(4) 0.0002(3) 0.0006(3) -0.0038(3) 
N1 0.0213(10) 0.0238(10) 0.0193(10) -0.0006(8) 0.0020(8) 0.0001(8) 
C1 0.0237(12) 0.0212(12) 0.0179(12) 0.0005(9) 0.0001(9) 0.0005(9) 
N2 0.0228(9) 0.0266(10) 0.0177(10) -0.0007(8) 0.0029(8) 0.0017(8) 
C16 0.0153(11) 0.0336(14) 0.0244(13) -0.0021(10) -0.0004(9) 0.0017(9) 
C21 0.0244(12) 0.0432(15) 0.0197(13) -0.0084(11) 0.0025(10) 0.0028(10) 
C11 0.0176(10) 0.0259(12) 0.0210(12) -0.0053(10) 0.0000(9) -0.0028(9) 
C2 0.0205(12) 0.0292(13) 0.0283(14) 0.0012(10) 0.0029(10) 0.0010(10) 
C41 0.0234(12) 0.0274(13) 0.0258(13) 0.0028(11) 0.0009(10) 0.0010(10) 
C22 0.0255(12) 0.0455(16) 0.0279(14) -0.0108(12) 0.0063(11) -0.0028(11) 
C47 0.0261(13) 0.0429(15) 0.0396(16) -0.0102(13) 0.0040(11) 0.0012(11) 
C3 0.0250(12) 0.0317(13) 0.0229(13) 0.0010(10) 0.0054(10) 0.0042(10) 
C163 0.0355(14) 0.0392(15) 0.0435(17) 0.0097(13) -0.0073(13) 0.0019(12) 
C44 0.0308(14) 0.0582(19) 0.0327(16) -0.0008(13) -0.0052(12) -0.0053(12) 
C14 0.0228(12) 0.0435(15) 0.0230(13) -0.0101(11) 0.0013(10) -0.0043(11) 
C221 0.0431(15) 0.0328(15) 0.0432(17) -0.0070(13) 0.0030(13) -0.0090(12) 
C13 0.0267(12) 0.0287(13) 0.0331(14) -0.0078(11) 0.0022(11) -0.0052(10) 
C162 0.0361(14) 0.0316(14) 0.0403(16) -0.0002(12) -0.0024(12) -0.0041(11) 
C161 0.0273(12) 0.0303(13) 0.0242(13) 0.0026(10) 0.0012(10) 0.0030(10) 
C15 0.0217(11) 0.0395(14) 0.0214(13) 0.0022(11) 0.0005(10) 0.0014(10) 
C43 0.0450(16) 0.062(2) 0.0287(15) -0.0044(14) 0.0046(13) -0.0108(14) 
C46 0.0267(13) 0.0535(17) 0.0354(15) -0.0129(14) 0.0001(11) -0.0035(12) 
C45 0.0373(14) 0.0476(17) 0.0324(15) 0.0057(13) 0.0064(12) 0.0024(12) 
C12 0.0234(12) 0.0298(13) 0.0264(13) -0.0035(10) 0.0012(10) -0.0062(10) 
C122 0.0544(18) 0.0384(16) 0.0518(19) 0.0037(14) 0.0130(15) -0.0141(14) 
C25 0.0465(17) 0.085(3) 0.0198(15) -0.0048(15) -0.0012(13) 0.0162(17) 
C123 0.0575(18) 0.0388(16) 0.0356(16) 0.0103(13) -0.0090(14) -0.0089(13) 
C42 0.0514(17) 0.0362(16) 0.0424(17) -0.0043(13) -0.0010(13) -0.0076(13) 
C121 0.0501(16) 0.0252(13) 0.0270(14) -0.0009(11) 0.0075(12) -0.0076(11) 
C24 0.0315(15) 0.113(3) 0.0234(16) -0.0236(18) -0.0027(13) -0.0014(17) 
C26 0.0404(15) 0.0556(18) 0.0183(13) -0.0012(12) 0.0037(11) 0.0148(13) 
C23 0.0336(14) 0.069(2) 0.0370(17) -0.0245(16) 0.0068(13) -0.0125(14) 
C261 0.096(2) 0.0474(18) 0.0181(14) 0.0033(13) -0.0049(15) 0.0288(17) 
C262 0.065(2) 0.068(3) 0.136(4) -0.032(3) 0.032(2) -0.0130(19) 
C222 0.074(3) 0.161(5) 0.105(4) 0.076(3) -0.004(2) -0.044(3) 
C263 0.081(3) 0.065(3) 0.185(5) 0.037(3) 0.054(3) 0.027(2) 
C223 0.139(4) 0.064(3) 0.070(3) -0.014(2) -0.002(2) 0.044(2) 
  
_geom_special_details 
; 
 All esds (except the esd in the dihedral angle between two l.s. planes) 
 are estimated using the full covariance matrix.  The cell esds are taken 
 into account individually in the estimation of esds in distances, angles 
 and torsion angles; correlations between esds in cell parameters are only 
 used when they are defined by crystal symmetry.  An approximate (isotropic) 
 treatment of cell esds is used for estimating esds involving l.s. planes. 
; 
  
loop_ 
 _geom_bond_atom_site_label_1 
 _geom_bond_atom_site_label_2 
 _geom_bond_distance 
 _geom_bond_site_symmetry_2 
 _geom_bond_publ_flag 
Ni1 C1 1.910(2) . ? 
Ni1 C41 1.968(2) . ? 
Si2 C41 1.846(3) . ? 
Si2 C45 1.875(3) . ? 
Si2 C46 1.876(2) . ? 
Si2 C47 1.887(2) . ? 
Si1 C41 1.838(3) . ? 
Si1 C42 1.879(3) . ? 
Si1 C43 1.881(3) . ? 
Si1 C44 1.883(3) . ? 
N1 C1 1.368(3) . ? 
N1 C2 1.384(3) . ? 
N1 C11 1.439(3) . ? 
C1 N2 1.367(3) . ? 
N2 C3 1.386(3) . ? 
N2 C21 1.444(3) . ? 
C16 C15 1.393(3) . ? 
C16 C11 1.394(3) . ? 
C16 C161 1.517(3) . ? 
C21 C26 1.396(4) . ? 
C21 C22 1.397(4) . ? 
C11 C12 1.402(3) . ? 
C2 C3 1.342(3) . ? 
C22 C23 1.398(3) . ? 
C22 C221 1.520(4) . ? 
C163 C161 1.528(3) . ? 
C14 C13 1.374(3) . ? 
C14 C15 1.384(3) . ? 
C221 C222 1.514(4) . ? 
C221 C223 1.520(4) . ? 
C13 C12 1.396(3) . ? 
C162 C161 1.531(3) . ? 
C12 C121 1.513(3) . ? 
C122 C121 1.528(3) . ? 
C25 C24 1.379(5) . ? 
C25 C26 1.385(4) . ? 
C123 C121 1.535(4) . ? 
C24 C23 1.375(5) . ? 
C26 C261 1.522(4) . ? 
C261 C263 1.477(4) . ? 
C261 C262 1.505(5) . ? 
  
loop_ 
 _geom_angle_atom_site_label_1 
 _geom_angle_atom_site_label_2 
 _geom_angle_atom_site_label_3 
 _geom_angle 
 _geom_angle_site_symmetry_1 
 _geom_angle_site_symmetry_3 
 _geom_angle_publ_flag 
C1 Ni1 C41 174.80(10) . . ? 
C41 Si2 C45 113.24(12) . . ? 
C41 Si2 C46 111.57(12) . . ? 
C45 Si2 C46 106.71(13) . . ? 
C41 Si2 C47 113.90(12) . . ? 
C45 Si2 C47 106.03(12) . . ? 
C46 Si2 C47 104.75(12) . . ? 
C41 Si1 C42 112.92(12) . . ? 
C41 Si1 C43 111.93(12) . . ? 
C42 Si1 C43 106.43(13) . . ? 
C41 Si1 C44 113.38(12) . . ? 
C42 Si1 C44 106.50(13) . . ? 
C43 Si1 C44 105.08(13) . . ? 
C1 N1 C2 111.96(19) . . ? 
C1 N1 C11 123.88(18) . . ? 
C2 N1 C11 124.14(18) . . ? 
N2 C1 N1 102.69(18) . . ? 
N2 C1 Ni1 130.10(16) . . ? 
N1 C1 Ni1 127.11(17) . . ? 
C1 N2 C3 112.04(18) . . ? 
C1 N2 C21 123.65(18) . . ? 
C3 N2 C21 124.21(18) . . ? 
C15 C16 C11 116.9(2) . . ? 
C15 C16 C161 121.2(2) . . ? 
C11 C16 C161 121.9(2) . . ? 
C26 C21 C22 123.9(2) . . ? 
C26 C21 N2 117.6(2) . . ? 
C22 C21 N2 118.6(2) . . ? 
C16 C11 C12 123.6(2) . . ? 
C16 C11 N1 118.20(19) . . ? 
C12 C11 N1 118.2(2) . . ? 
C3 C2 N1 106.8(2) . . ? 
Si1 C41 Si2 121.01(13) . . ? 
Si1 C41 Ni1 110.48(13) . . ? 
Si2 C41 Ni1 112.21(12) . . ? 
C21 C22 C23 116.6(3) . . ? 
C21 C22 C221 122.2(2) . . ? 
C23 C22 C221 121.1(3) . . ? 
C2 C3 N2 106.5(2) . . ? 
C13 C14 C15 120.6(2) . . ? 
C222 C221 C22 111.7(3) . . ? 
C222 C221 C223 112.5(3) . . ? 
C22 C221 C223 111.6(2) . . ? 
C14 C13 C12 121.1(2) . . ? 
C16 C161 C163 112.3(2) . . ? 
C16 C161 C162 110.60(19) . . ? 
C163 C161 C162 111.2(2) . . ? 
C14 C15 C16 121.1(2) . . ? 
C13 C12 C11 116.8(2) . . ? 
C13 C12 C121 120.9(2) . . ? 
C11 C12 C121 122.3(2) . . ? 
C24 C25 C26 121.2(3) . . ? 
C12 C121 C122 111.4(2) . . ? 
C12 C121 C123 111.1(2) . . ? 
C122 C121 C123 110.5(2) . . ? 
C23 C24 C25 120.9(3) . . ? 
C25 C26 C21 116.7(3) . . ? 
C25 C26 C261 121.2(3) . . ? 
C21 C26 C261 122.2(2) . . ? 
C24 C23 C22 120.7(3) . . ? 
C263 C261 C262 110.0(3) . . ? 
C263 C261 C26 113.5(3) . . ? 
C262 C261 C26 114.5(2) . . ? 
  
_diffrn_measured_fraction_theta_max    1.000 
_diffrn_reflns_theta_full              25.00 
_diffrn_measured_fraction_theta_full   1.000 
_refine_diff_density_max    0.988 
_refine_diff_density_min   -0.739 
_refine_diff_density_rms    0.066 
  

data_db10a 
  
_audit_creation_method            SHELXL-97 
_chemical_name_systematic 
; 
 ? 
; 
_chemical_name_common             ? 
_chemical_melting_point           ? 
_chemical_formula_moiety          ? 
_chemical_formula_sum 
 'C58 H69 N2 Ni' 
_chemical_formula_weight          852.86 
  
loop_ 
 _atom_type_symbol 
 _atom_type_description 
 _atom_type_scat_dispersion_real 
 _atom_type_scat_dispersion_imag 
 _atom_type_scat_source 
 'C'  'C'   0.0033   0.0016 
 'International Tables Vol C Tables 4.2.6.8 and 6.1.1.4' 
 'H'  'H'   0.0000   0.0000 
 'International Tables Vol C Tables 4.2.6.8 and 6.1.1.4' 
 'N'  'N'   0.0061   0.0033 
 'International Tables Vol C Tables 4.2.6.8 and 6.1.1.4' 
 'Ni'  'Ni'   0.3393   1.1124 
 'International Tables Vol C Tables 4.2.6.8 and 6.1.1.4' 
  
_symmetry_cell_setting            Monoclinic 
_symmetry_space_group_name_H-M    P2(1)/n 
  
loop_ 
 _symmetry_equiv_pos_as_xyz 
 'x, y, z' 
 '-x+1/2, y+1/2, -z+1/2' 
 '-x, -y, -z' 
 'x-1/2, -y-1/2, z-1/2' 
  
_cell_length_a                    11.5681(12) 
_cell_length_b                    14.0160(15) 
_cell_length_c                    29.664(3) 
_cell_angle_alpha                 90.00 
_cell_angle_beta                  99.368(2) 
_cell_angle_gamma                 90.00 
_cell_volume                      4745.6(9) 
_cell_formula_units_Z             4 
_cell_measurement_temperature     100(2) 
_cell_measurement_reflns_used     ? 
_cell_measurement_theta_min       ? 
_cell_measurement_theta_max       ? 
  
_exptl_crystal_description        plate 
_exptl_crystal_colour             yellow 
_exptl_crystal_size_max           0.6 
_exptl_crystal_size_mid           0.2 
_exptl_crystal_size_min           0.2 
_exptl_crystal_density_meas       ? 
_exptl_crystal_density_diffrn     1.194 
_exptl_crystal_density_method     'not measured' 
_exptl_crystal_F_000              1836 
_exptl_absorpt_coefficient_mu     0.448 
_exptl_absorpt_correction_type    none 
_exptl_absorpt_correction_T_min   ? 
_exptl_absorpt_correction_T_max   ? 
_exptl_absorpt_process_details    ? 
  
_exptl_special_details 
; 
 ? 
; 
  
_diffrn_ambient_temperature       100(2) 
_diffrn_radiation_wavelength      0.71073 
_diffrn_radiation_type            MoK\a 
_diffrn_radiation_source          'fine-focus sealed tube' 
_diffrn_radiation_monochromator   graphite 
_diffrn_measurement_device_type   'Bruker P4' 
_diffrn_measurement_method        '\w scans' 
_diffrn_detector_area_resol_mean  ? 
_diffrn_standards_number          ? 
_diffrn_standards_interval_count  ? 
_diffrn_standards_interval_time   ? 
_diffrn_standards_decay_%         ? 
_diffrn_reflns_number             24386 
_diffrn_reflns_av_R_equivalents   0.0761 
_diffrn_reflns_av_sigmaI/netI     0.0628 
_diffrn_reflns_limit_h_min        -13 
_diffrn_reflns_limit_h_max        13 
_diffrn_reflns_limit_k_min        -9 
_diffrn_reflns_limit_k_max        16 
_diffrn_reflns_limit_l_min        -32 
_diffrn_reflns_limit_l_max        35 
_diffrn_reflns_theta_min          1.61 
_diffrn_reflns_theta_max          25.00 
_reflns_number_total              8356 
_reflns_number_gt                 6933 
_reflns_threshold_expression      >2sigma(I) 
  
_computing_data_collection        'Bruker XSCANS' 
_computing_cell_refinement        'Bruker XSCANS' 
_computing_data_reduction         'Bruker SHELXTL' 
_computing_structure_solution     'SHELXS-97 (Sheldrick, 1990)' 
_computing_structure_refinement   'SHELXL-97 (Sheldrick, 1997)' 
_computing_molecular_graphics     'Bruker SHELXTL' 
_computing_publication_material   'Bruker SHELXTL' 
  
_refine_special_details 
; 
 Refinement of F^2^ against ALL reflections.  The weighted R-factor wR and 
 goodness of fit S are based on F^2^, conventional R-factors R are based 
 on F, with F set to zero for negative F^2^. The threshold expression of 
 F^2^ > 2sigma(F^2^) is used only for calculating R-factors(gt) etc. and is 
 not relevant to the choice of reflections for refinement.  R-factors based 
 on F^2^ are statistically about twice as large as those based on F, and R- 
 factors based on ALL data will be even larger. 
; 
  
_refine_ls_structure_factor_coef  Fsqd 
_refine_ls_matrix_type            full 
_refine_ls_weighting_scheme       calc 
_refine_ls_weighting_details 
 'calc w=1/[\s^2^(Fo^2^)+(0.0607P)^2^+0.0000P] where P=(Fo^2^+2Fc^2^)/3' 
_atom_sites_solution_primary      direct 
_atom_sites_solution_secondary    difmap 
_atom_sites_solution_hydrogens    geom 
_refine_ls_hydrogen_treatment     constr 
_refine_ls_extinction_method      none 
_refine_ls_extinction_coef        ? 
_refine_ls_number_reflns          8356 
_refine_ls_number_parameters      565 
_refine_ls_number_restraints      0 
_refine_ls_R_factor_all           0.0520 
_refine_ls_R_factor_gt            0.0435 
_refine_ls_wR_factor_ref          0.1142 
_refine_ls_wR_factor_gt           0.1107 
_refine_ls_goodness_of_fit_ref    1.053 
_refine_ls_restrained_S_all       1.053 
_refine_ls_shift/su_max           0.003 
_refine_ls_shift/su_mean          0.000 
  
loop_ 
 _atom_site_label 
 _atom_site_type_symbol 
 _atom_site_fract_x 
 _atom_site_fract_y 
 _atom_site_fract_z 
 _atom_site_U_iso_or_equiv 
 _atom_site_adp_type 
 _atom_site_occupancy 
 _atom_site_symmetry_multiplicity 
 _atom_site_calc_flag 
 _atom_site_refinement_flags 
 _atom_site_disorder_assembly 
 _atom_site_disorder_group 
Ni1 Ni 0.53281(2) 0.299267(19) 0.849079(8) 0.01571(10) Uani 1 1 d . . . 
N1 N 0.33547(13) 0.21314(12) 0.78738(5) 0.0153(4) Uani 1 1 d . . . 
C15 C 0.49135(18) 0.20846(15) 0.68745(7) 0.0207(5) Uani 1 1 d . . . 
H15A H 0.4923 0.2411 0.6594 0.025 Uiso 1 1 calc R . . 
C2 C 0.21546(17) 0.19821(15) 0.78087(7) 0.0184(5) Uani 1 1 d . . . 
H2A H 0.1695 0.1679 0.7554 0.022 Uiso 1 1 calc R . . 
C32 C 0.75872(17) 0.30784(15) 0.91128(7) 0.0186(5) Uani 1 1 d . . . 
C1 C 0.37472(16) 0.25856(14) 0.82762(6) 0.0155(4) Uani 1 1 d . . . 
C21 C 0.26959(16) 0.30852(15) 0.89110(6) 0.0164(4) Uani 1 1 d . . . 
C11 C 0.41341(16) 0.18413(15) 0.75622(7) 0.0169(4) Uani 1 1 d . . . 
C35 C 0.88544(17) 0.39082(16) 0.85026(7) 0.0215(5) Uani 1 1 d . . . 
H35A H 0.9282 0.4207 0.8294 0.026 Uiso 1 1 calc R . . 
C221 C 0.24367(18) 0.13604(16) 0.91567(7) 0.0220(5) Uani 1 1 d . . . 
H22A H 0.2168 0.1261 0.8822 0.026 Uiso 1 1 calc R . . 
N2 N 0.27474(13) 0.27148(12) 0.84596(5) 0.0158(4) Uani 1 1 d . . . 
C22 C 0.24710(16) 0.24303(16) 0.92449(7) 0.0187(5) Uani 1 1 d . . . 
C31 C 0.69630(17) 0.33388(15) 0.86789(7) 0.0164(4) Uani 1 1 d . . . 
C46 C 0.70997(17) 0.17852(16) 0.96548(7) 0.0201(5) Uani 1 1 d . . . 
C23 C 0.23495(18) 0.27982(16) 0.96705(7) 0.0226(5) Uani 1 1 d . . . 
H23A H 0.2170 0.2380 0.9901 0.027 Uiso 1 1 calc R . . 
C461 C 0.79084(18) 0.10876(16) 0.94741(7) 0.0244(5) Uani 1 1 d . . . 
H46A H 0.7846 0.1168 0.9143 0.037 Uiso 1 1 calc R . . 
H46B H 0.7686 0.0435 0.9542 0.037 Uiso 1 1 calc R . . 
H46C H 0.8717 0.1208 0.9621 0.037 Uiso 1 1 calc R . . 
C34 C 0.94351(18) 0.36080(16) 0.89230(7) 0.0233(5) Uani 1 1 d . . . 
H34A H 1.0261 0.3679 0.9000 0.028 Uiso 1 1 calc R . . 
C162 C 0.3114(2) 0.34399(18) 0.65157(7) 0.0319(6) Uani 1 1 d . . . 
H16A H 0.2488 0.3914 0.6444 0.048 Uiso 1 1 calc R . . 
H16B H 0.2920 0.2871 0.6326 0.048 Uiso 1 1 calc R . . 
H16C H 0.3853 0.3711 0.6454 0.048 Uiso 1 1 calc R . . 
C26 C 0.28319(16) 0.40694(15) 0.89897(7) 0.0177(4) Uani 1 1 d . . . 
C12 C 0.48830(16) 0.10641(15) 0.76855(6) 0.0169(4) Uani 1 1 d . . . 
C222 C 0.15889(19) 0.08269(17) 0.94123(8) 0.0301(5) Uani 1 1 d . . . 
H22B H 0.0809 0.1116 0.9341 0.045 Uiso 1 1 calc R . . 
H22C H 0.1868 0.0867 0.9742 0.045 Uiso 1 1 calc R . . 
H22D H 0.1547 0.0156 0.9318 0.045 Uiso 1 1 calc R . . 
C24 C 0.24861(18) 0.37593(17) 0.97624(7) 0.0234(5) Uani 1 1 d . . . 
H24A H 0.2404 0.3995 1.0056 0.028 Uiso 1 1 calc R . . 
C161 C 0.32394(18) 0.31656(15) 0.70193(7) 0.0215(5) Uani 1 1 d . . . 
H16D H 0.2455 0.2944 0.7077 0.026 Uiso 1 1 calc R . . 
C163 C 0.35701(19) 0.40503(16) 0.73163(7) 0.0269(5) Uani 1 1 d . . . 
H16E H 0.3500 0.3906 0.7634 0.040 Uiso 1 1 calc R . . 
H16F H 0.3042 0.4577 0.7206 0.040 Uiso 1 1 calc R . . 
H16G H 0.4379 0.4234 0.7299 0.040 Uiso 1 1 calc R . . 
C41 C 0.69315(16) 0.27098(16) 0.94776(6) 0.0183(4) Uani 1 1 d . . . 
C36 C 0.76480(16) 0.37770(15) 0.83807(6) 0.0177(4) Uani 1 1 d . . . 
C33 C 0.88011(17) 0.32045(16) 0.92305(7) 0.0224(5) Uani 1 1 d . . . 
H33A H 0.9190 0.3011 0.9523 0.027 Uiso 1 1 calc R . . 
C122 C 0.59152(18) 0.05730(16) 0.84701(7) 0.0251(5) Uani 1 1 d . . . 
H12A H 0.5995 0.1246 0.8558 0.038 Uiso 1 1 calc R . . 
H12B H 0.6612 0.0368 0.8347 0.038 Uiso 1 1 calc R . . 
H12C H 0.5834 0.0186 0.8738 0.038 Uiso 1 1 calc R . . 
C16 C 0.41081(17) 0.23531(15) 0.71540(7) 0.0182(4) Uani 1 1 d . . . 
C3 C 0.17690(17) 0.23472(15) 0.81737(6) 0.0186(4) Uani 1 1 d . . . 
H3A H 0.0982 0.2355 0.8228 0.022 Uiso 1 1 calc R . . 
C121 C 0.48283(17) 0.04449(16) 0.81047(7) 0.0210(5) Uani 1 1 d . . . 
H12D H 0.4127 0.0643 0.8239 0.025 Uiso 1 1 calc R . . 
C43 C 0.56178(18) 0.30245(16) 1.00177(7) 0.0235(5) Uani 1 1 d . . . 
H43A H 0.5114 0.3451 1.0142 0.028 Uiso 1 1 calc R . . 
C998 C 0.5161(2) 0.19538(18) 0.56094(7) 0.0310(6) Uani 1 1 d . . . 
C997 C 0.4867(2) 0.29145(19) 0.55253(7) 0.0325(6) Uani 1 1 d . . . 
H99A H 0.4091 0.3084 0.5393 0.039 Uiso 1 1 calc R . . 
C25 C 0.27421(16) 0.43852(16) 0.94296(7) 0.0210(5) Uani 1 1 d . . . 
H25A H 0.2859 0.5042 0.9502 0.025 Uiso 1 1 calc R . . 
C53 C 0.68059(17) 0.41698(16) 0.71001(7) 0.0200(5) Uani 1 1 d . . . 
H53A H 0.6897 0.3856 0.6824 0.024 Uiso 1 1 calc R . . 
C521 C 0.79028(18) 0.28077(16) 0.75222(7) 0.0237(5) Uani 1 1 d . . . 
H52A H 0.7844 0.2567 0.7209 0.036 Uiso 1 1 calc R . . 
H52B H 0.7560 0.2342 0.7709 0.036 Uiso 1 1 calc R . . 
H52C H 0.8729 0.2909 0.7651 0.036 Uiso 1 1 calc R . . 
C52 C 0.72508(16) 0.37386(15) 0.75180(7) 0.0187(5) Uani 1 1 d . . . 
C44 C 0.57645(19) 0.21048(17) 1.01929(7) 0.0262(5) Uani 1 1 d . . . 
C995 C 0.6836(2) 0.33869(19) 0.58293(7) 0.0319(6) Uani 1 1 d . . . 
H99B H 0.7411 0.3871 0.5903 0.038 Uiso 1 1 calc R . . 
C261 C 0.30092(17) 0.47615(15) 0.86128(7) 0.0201(5) Uani 1 1 d . . . 
H26A H 0.3606 0.4480 0.8443 0.024 Uiso 1 1 calc R . . 
C14 C 0.57001(17) 0.13474(16) 0.70001(7) 0.0224(5) Uani 1 1 d . . . 
H14A H 0.6256 0.1189 0.6809 0.027 Uiso 1 1 calc R . . 
C55 C 0.60788(16) 0.54720(15) 0.74861(7) 0.0194(5) Uani 1 1 d . . . 
H55A H 0.5685 0.6068 0.7477 0.023 Uiso 1 1 calc R . . 
C42 C 0.61826(17) 0.33405(16) 0.96674(6) 0.0198(5) Uani 1 1 d . . . 
C56 C 0.64809(16) 0.50554(15) 0.79084(7) 0.0184(5) Uani 1 1 d . . . 
C51 C 0.70923(16) 0.41806(15) 0.79281(6) 0.0172(4) Uani 1 1 d . . . 
C54 C 0.62349(17) 0.50449(15) 0.70780(7) 0.0198(5) Uani 1 1 d . . . 
C123 C 0.46939(19) -0.06164(16) 0.79767(7) 0.0266(5) Uani 1 1 d . . . 
H12E H 0.4009 -0.0701 0.7738 0.040 Uiso 1 1 calc R . . 
H12F H 0.4588 -0.0988 0.8247 0.040 Uiso 1 1 calc R . . 
H12G H 0.5398 -0.0837 0.7864 0.040 Uiso 1 1 calc R . . 
C13 C 0.56873(17) 0.08422(16) 0.73973(7) 0.0210(5) Uani 1 1 d . . . 
H13A H 0.6231 0.0338 0.7476 0.025 Uiso 1 1 calc R . . 
C441 C 0.5120(2) 0.1789(2) 1.05704(8) 0.0386(6) Uani 1 1 d . . . 
H44A H 0.5114 0.1091 1.0585 0.058 Uiso 1 1 calc R . . 
H44B H 0.4312 0.2026 1.0509 0.058 Uiso 1 1 calc R . . 
H44C H 0.5514 0.2046 1.0863 0.058 Uiso 1 1 calc R . . 
C262 C 0.34470(19) 0.57526(16) 0.87837(7) 0.0255(5) Uani 1 1 d . . . 
H26B H 0.4163 0.5685 0.9008 0.038 Uiso 1 1 calc R . . 
H26C H 0.2844 0.6070 0.8926 0.038 Uiso 1 1 calc R . . 
H26D H 0.3613 0.6136 0.8525 0.038 Uiso 1 1 calc R . . 
C421 C 0.60069(19) 0.43495(16) 0.95002(7) 0.0253(5) Uani 1 1 d . . . 
H42A H 0.5613 0.4716 0.9712 0.038 Uiso 1 1 calc R . . 
H42B H 0.5524 0.4352 0.9196 0.038 Uiso 1 1 calc R . . 
H42C H 0.6769 0.4639 0.9483 0.038 Uiso 1 1 calc R . . 
C993 C 0.6298(2) 0.17343(18) 0.58072(7) 0.0293(5) Uani 1 1 d . . . 
H99C H 0.6510 0.1087 0.5868 0.035 Uiso 1 1 calc R . . 
C223 C 0.36768(19) 0.09520(17) 0.92749(8) 0.0324(6) Uani 1 1 d . . . 
H22E H 0.4208 0.1314 0.9113 0.049 Uiso 1 1 calc R . . 
H22F H 0.3673 0.0281 0.9182 0.049 Uiso 1 1 calc R . . 
H22G H 0.3943 0.1000 0.9605 0.049 Uiso 1 1 calc R . . 
C45 C 0.65099(18) 0.14978(17) 1.00064(7) 0.0241(5) Uani 1 1 d . . . 
H45A H 0.6622 0.0867 1.0122 0.029 Uiso 1 1 calc R . . 
C994 C 0.7128(2) 0.24376(19) 0.59170(7) 0.0316(6) Uani 1 1 d . . . 
H99D H 0.7902 0.2272 0.6053 0.038 Uiso 1 1 calc R . . 
C996 C 0.5712(2) 0.36231(19) 0.56351(7) 0.0323(6) Uani 1 1 d . . . 
H99E H 0.5509 0.4273 0.5575 0.039 Uiso 1 1 calc R . . 
C561 C 0.62582(18) 0.55477(16) 0.83379(7) 0.0236(5) Uani 1 1 d . . . 
H56A H 0.6978 0.5546 0.8564 0.035 Uiso 1 1 calc R . . 
H56B H 0.5639 0.5210 0.8462 0.035 Uiso 1 1 calc R . . 
H56C H 0.6013 0.6207 0.8267 0.035 Uiso 1 1 calc R . . 
C999 C 0.4269(2) 0.1185(2) 0.54922(9) 0.0503(8) Uani 1 1 d . . . 
H99F H 0.3497 0.1473 0.5396 0.075 Uiso 1 1 calc R . . 
H99G H 0.4249 0.0782 0.5761 0.075 Uiso 1 1 calc R . . 
H99H H 0.4477 0.0795 0.5243 0.075 Uiso 1 1 calc R . . 
C541 C 0.57603(19) 0.55148(17) 0.66294(7) 0.0267(5) Uani 1 1 d . . . 
H54A H 0.5966 0.5131 0.6378 0.040 Uiso 1 1 calc R . . 
H54B H 0.6100 0.6154 0.6620 0.040 Uiso 1 1 calc R . . 
H54C H 0.4906 0.5566 0.6598 0.040 Uiso 1 1 calc R . . 
C263 C 0.18682(18) 0.48751(17) 0.82758(7) 0.0279(5) Uani 1 1 d . . . 
H26E H 0.1608 0.4250 0.8151 0.042 Uiso 1 1 calc R . . 
H26F H 0.2000 0.5299 0.8026 0.042 Uiso 1 1 calc R . . 
H26G H 0.1266 0.5150 0.8434 0.042 Uiso 1 1 calc R . . 
  
loop_ 
 _atom_site_aniso_label 
 _atom_site_aniso_U_11 
 _atom_site_aniso_U_22 
 _atom_site_aniso_U_33 
 _atom_site_aniso_U_23 
 _atom_site_aniso_U_13 
 _atom_site_aniso_U_12 
Ni1 0.01293(15) 0.01447(16) 0.01925(15) -0.00011(11) 0.00120(10) -0.00083(10) 
N1 0.0124(8) 0.0141(9) 0.0193(8) -0.0008(7) 0.0023(7) 0.0000(7) 
C15 0.0221(11) 0.0192(12) 0.0206(10) -0.0001(9) 0.0032(8) -0.0038(9) 
C2 0.0150(10) 0.0166(11) 0.0221(10) 0.0006(9) -0.0015(8) -0.0023(9) 
C32 0.0177(10) 0.0153(11) 0.0226(11) -0.0019(9) 0.0022(8) 0.0008(9) 
C1 0.0168(10) 0.0115(11) 0.0187(10) 0.0025(9) 0.0041(8) 0.0018(9) 
C21 0.0106(9) 0.0192(12) 0.0188(10) -0.0010(9) 0.0006(8) 0.0027(8) 
C11 0.0123(10) 0.0184(12) 0.0200(10) -0.0061(9) 0.0025(8) -0.0028(9) 
C35 0.0184(11) 0.0214(12) 0.0253(11) 0.0015(10) 0.0056(8) -0.0025(9) 
C221 0.0265(11) 0.0187(12) 0.0199(10) 0.0024(9) 0.0016(9) -0.0012(10) 
N2 0.0131(8) 0.0145(9) 0.0193(8) 0.0002(7) 0.0006(6) -0.0009(7) 
C22 0.0118(10) 0.0208(12) 0.0226(11) 0.0021(9) -0.0001(8) 0.0009(9) 
C31 0.0165(10) 0.0102(10) 0.0225(10) -0.0029(9) 0.0035(8) 0.0010(8) 
C46 0.0156(10) 0.0223(12) 0.0212(10) 0.0011(9) -0.0009(8) 0.0023(9) 
C23 0.0218(11) 0.0234(13) 0.0223(11) 0.0033(10) 0.0031(8) -0.0012(10) 
C461 0.0248(11) 0.0217(12) 0.0265(11) 0.0037(10) 0.0032(9) 0.0042(10) 
C34 0.0124(10) 0.0268(13) 0.0298(11) -0.0008(10) 0.0009(8) -0.0029(9) 
C162 0.0363(13) 0.0288(14) 0.0302(12) 0.0060(11) 0.0042(10) 0.0078(11) 
C26 0.0104(9) 0.0188(12) 0.0232(10) 0.0013(9) 0.0005(8) 0.0018(8) 
C12 0.0136(10) 0.0163(11) 0.0200(10) -0.0037(9) -0.0003(8) -0.0025(9) 
C222 0.0321(13) 0.0209(13) 0.0378(13) 0.0017(11) 0.0072(10) -0.0061(11) 
C24 0.0245(11) 0.0273(13) 0.0188(10) -0.0026(10) 0.0041(9) 0.0010(10) 
C161 0.0189(11) 0.0181(12) 0.0271(11) 0.0024(9) 0.0031(9) 0.0008(9) 
C163 0.0273(12) 0.0194(13) 0.0344(12) -0.0006(10) 0.0059(10) 0.0007(10) 
C41 0.0141(10) 0.0203(12) 0.0190(10) -0.0009(9) -0.0018(8) -0.0016(9) 
C36 0.0155(10) 0.0141(11) 0.0226(10) -0.0020(9) 0.0005(8) 0.0001(9) 
C33 0.0189(11) 0.0244(13) 0.0218(11) 0.0004(9) -0.0027(8) 0.0003(9) 
C122 0.0270(12) 0.0206(12) 0.0263(11) -0.0008(10) 0.0004(9) 0.0021(10) 
C16 0.0160(10) 0.0142(11) 0.0234(11) -0.0032(9) 0.0005(8) -0.0029(9) 
C3 0.0117(10) 0.0199(12) 0.0234(11) 0.0009(9) 0.0003(8) -0.0017(9) 
C121 0.0169(10) 0.0192(12) 0.0270(11) 0.0005(9) 0.0040(8) 0.0025(9) 
C43 0.0190(11) 0.0273(13) 0.0239(11) -0.0006(10) 0.0028(9) 0.0061(10) 
C998 0.0323(13) 0.0400(16) 0.0211(11) 0.0034(11) 0.0060(10) -0.0077(11) 
C997 0.0265(12) 0.0438(17) 0.0269(12) 0.0072(11) 0.0033(10) 0.0047(12) 
C25 0.0178(10) 0.0171(12) 0.0272(11) -0.0043(9) 0.0011(8) 0.0007(9) 
C53 0.0185(10) 0.0199(12) 0.0218(10) -0.0023(9) 0.0035(8) -0.0044(9) 
C521 0.0231(11) 0.0195(12) 0.0288(12) -0.0015(10) 0.0049(9) -0.0003(10) 
C52 0.0142(10) 0.0163(11) 0.0255(11) -0.0002(9) 0.0029(8) -0.0041(9) 
C44 0.0219(11) 0.0335(15) 0.0239(11) 0.0057(10) 0.0055(9) 0.0042(10) 
C995 0.0345(14) 0.0332(15) 0.0280(12) -0.0019(11) 0.0050(10) -0.0034(12) 
C261 0.0188(10) 0.0171(12) 0.0248(11) 0.0002(9) 0.0046(8) 0.0033(9) 
C14 0.0183(11) 0.0228(12) 0.0272(11) -0.0066(10) 0.0070(9) -0.0019(9) 
C55 0.0130(10) 0.0137(11) 0.0308(11) 0.0030(9) 0.0015(8) -0.0017(9) 
C42 0.0159(10) 0.0218(12) 0.0200(10) -0.0020(9) -0.0025(8) -0.0006(9) 
C56 0.0140(10) 0.0165(11) 0.0247(11) -0.0010(9) 0.0031(8) -0.0060(9) 
C51 0.0113(9) 0.0164(11) 0.0237(10) 0.0013(9) 0.0025(8) -0.0054(8) 
C54 0.0153(10) 0.0188(12) 0.0250(11) 0.0025(9) 0.0025(8) -0.0047(9) 
C123 0.0265(12) 0.0198(13) 0.0330(12) 0.0008(10) 0.0030(9) -0.0027(10) 
C13 0.0163(10) 0.0198(12) 0.0261(11) -0.0050(9) 0.0007(8) 0.0011(9) 
C441 0.0357(14) 0.0439(17) 0.0396(14) 0.0151(12) 0.0160(11) 0.0107(12) 
C262 0.0262(12) 0.0177(12) 0.0332(12) 0.0013(10) 0.0069(9) 0.0003(10) 
C421 0.0277(12) 0.0213(13) 0.0266(11) -0.0032(10) 0.0040(9) 0.0034(10) 
C993 0.0346(13) 0.0305(14) 0.0238(11) 0.0056(10) 0.0073(10) 0.0040(11) 
C223 0.0298(13) 0.0203(13) 0.0478(14) 0.0025(11) 0.0084(11) 0.0034(10) 
C45 0.0222(11) 0.0210(12) 0.0273(11) 0.0077(10) -0.0006(9) 0.0037(10) 
C994 0.0282(13) 0.0375(15) 0.0293(12) 0.0051(11) 0.0049(10) 0.0014(11) 
C996 0.0382(14) 0.0301(14) 0.0291(12) -0.0009(11) 0.0072(10) 0.0058(12) 
C561 0.0235(11) 0.0195(12) 0.0280(11) -0.0010(10) 0.0044(9) 0.0003(10) 
C999 0.0474(17) 0.053(2) 0.0472(16) 0.0147(15) -0.0018(13) -0.0181(15) 
C541 0.0277(12) 0.0258(13) 0.0259(11) 0.0041(10) 0.0023(9) 0.0015(10) 
C263 0.0279(12) 0.0225(13) 0.0314(12) 0.0073(10) -0.0006(9) 0.0035(10) 
  
_geom_special_details 
; 
 All esds (except the esd in the dihedral angle between two l.s. planes) 
 are estimated using the full covariance matrix.  The cell esds are taken 
 into account individually in the estimation of esds in distances, angles 
 and torsion angles; correlations between esds in cell parameters are only 
 used when they are defined by crystal symmetry.  An approximate (isotropic) 
 treatment of cell esds is used for estimating esds involving l.s. planes. 
; 
  
loop_ 
 _geom_bond_atom_site_label_1 
 _geom_bond_atom_site_label_2 
 _geom_bond_distance 
 _geom_bond_site_symmetry_2 
 _geom_bond_publ_flag 
Ni1 C1 1.9226(19) . ? 
Ni1 C31 1.944(2) . ? 
N1 C1 1.364(2) . ? 
N1 C2 1.386(2) . ? 
N1 C11 1.451(2) . ? 
C15 C14 1.387(3) . ? 
C15 C16 1.396(3) . ? 
C2 C3 1.338(3) . ? 
C32 C33 1.402(3) . ? 
C32 C31 1.417(3) . ? 
C32 C41 1.510(3) . ? 
C1 N2 1.368(2) . ? 
C21 C26 1.404(3) . ? 
C21 C22 1.405(3) . ? 
C21 N2 1.446(2) . ? 
C11 C12 1.403(3) . ? 
C11 C16 1.403(3) . ? 
C35 C34 1.383(3) . ? 
C35 C36 1.396(3) . ? 
C221 C22 1.522(3) . ? 
C221 C222 1.529(3) . ? 
C221 C223 1.531(3) . ? 
N2 C3 1.398(2) . ? 
C22 C23 1.392(3) . ? 
C31 C36 1.420(3) . ? 
C46 C45 1.396(3) . ? 
C46 C41 1.400(3) . ? 
C46 C461 1.510(3) . ? 
C23 C24 1.378(3) . ? 
C34 C33 1.381(3) . ? 
C162 C161 1.526(3) . ? 
C26 C25 1.398(3) . ? 
C26 C261 1.519(3) . ? 
C12 C13 1.397(3) . ? 
C12 C121 1.526(3) . ? 
C24 C25 1.388(3) . ? 
C161 C16 1.528(3) . ? 
C161 C163 1.533(3) . ? 
C41 C42 1.417(3) . ? 
C36 C51 1.502(3) . ? 
C122 C121 1.531(3) . ? 
C121 C123 1.537(3) . ? 
C43 C42 1.387(3) . ? 
C43 C44 1.390(3) . ? 
C998 C993 1.386(3) . ? 
C998 C997 1.401(3) . ? 
C998 C999 1.493(4) . ? 
C997 C996 1.394(3) . ? 
C53 C54 1.390(3) . ? 
C53 C52 1.400(3) . ? 
C521 C52 1.506(3) . ? 
C52 C51 1.403(3) . ? 
C44 C45 1.389(3) . ? 
C44 C441 1.509(3) . ? 
C995 C996 1.375(3) . ? 
C995 C994 1.387(4) . ? 
C261 C263 1.529(3) . ? 
C261 C262 1.536(3) . ? 
C14 C13 1.377(3) . ? 
C55 C54 1.388(3) . ? 
C55 C56 1.392(3) . ? 
C42 C421 1.501(3) . ? 
C56 C51 1.412(3) . ? 
C56 C561 1.507(3) . ? 
C54 C541 1.506(3) . ? 
C993 C994 1.377(3) . ? 
  
loop_ 
 _geom_angle_atom_site_label_1 
 _geom_angle_atom_site_label_2 
 _geom_angle_atom_site_label_3 
 _geom_angle 
 _geom_angle_site_symmetry_1 
 _geom_angle_site_symmetry_3 
 _geom_angle_publ_flag 
C1 Ni1 C31 175.97(8) . . ? 
C1 N1 C2 112.06(16) . . ? 
C1 N1 C11 122.39(16) . . ? 
C2 N1 C11 125.55(16) . . ? 
C14 C15 C16 120.88(19) . . ? 
C3 C2 N1 106.74(17) . . ? 
C33 C32 C31 122.37(18) . . ? 
C33 C32 C41 117.66(17) . . ? 
C31 C32 C41 119.86(17) . . ? 
N1 C1 N2 103.15(16) . . ? 
N1 C1 Ni1 126.27(13) . . ? 
N2 C1 Ni1 130.48(14) . . ? 
C26 C21 C22 123.59(18) . . ? 
C26 C21 N2 119.11(17) . . ? 
C22 C21 N2 117.27(18) . . ? 
C12 C11 C16 123.20(18) . . ? 
C12 C11 N1 118.23(17) . . ? 
C16 C11 N1 118.57(17) . . ? 
C34 C35 C36 120.81(19) . . ? 
C22 C221 C222 113.43(17) . . ? 
C22 C221 C223 109.38(17) . . ? 
C222 C221 C223 110.87(18) . . ? 
C1 N2 C3 111.30(16) . . ? 
C1 N2 C21 125.50(16) . . ? 
C3 N2 C21 122.88(15) . . ? 
C23 C22 C21 117.1(2) . . ? 
C23 C22 C221 121.15(18) . . ? 
C21 C22 C221 121.68(17) . . ? 
C32 C31 C36 115.07(18) . . ? 
C32 C31 Ni1 121.63(15) . . ? 
C36 C31 Ni1 123.00(14) . . ? 
C45 C46 C41 119.52(19) . . ? 
C45 C46 C461 119.0(2) . . ? 
C41 C46 C461 121.48(18) . . ? 
C24 C23 C22 121.1(2) . . ? 
C33 C34 C35 119.22(19) . . ? 
C25 C26 C21 116.31(19) . . ? 
C25 C26 C261 121.62(19) . . ? 
C21 C26 C261 122.00(18) . . ? 
C13 C12 C11 117.25(18) . . ? 
C13 C12 C121 119.47(18) . . ? 
C11 C12 C121 123.25(17) . . ? 
C23 C24 C25 120.53(19) . . ? 
C162 C161 C16 113.42(17) . . ? 
C162 C161 C163 109.50(19) . . ? 
C16 C161 C163 111.12(17) . . ? 
C46 C41 C42 119.01(18) . . ? 
C46 C41 C32 122.02(18) . . ? 
C42 C41 C32 118.83(19) . . ? 
C35 C36 C31 122.12(18) . . ? 
C35 C36 C51 116.51(17) . . ? 
C31 C36 C51 121.26(17) . . ? 
C34 C33 C32 120.34(19) . . ? 
C15 C16 C11 116.87(18) . . ? 
C15 C16 C161 121.30(18) . . ? 
C11 C16 C161 121.83(17) . . ? 
C2 C3 N2 106.76(17) . . ? 
C12 C121 C122 111.84(17) . . ? 
C12 C121 C123 111.41(17) . . ? 
C122 C121 C123 109.08(17) . . ? 
C42 C43 C44 122.2(2) . . ? 
C993 C998 C997 118.3(2) . . ? 
C993 C998 C999 120.7(2) . . ? 
C997 C998 C999 121.0(2) . . ? 
C996 C997 C998 120.2(2) . . ? 
C24 C25 C26 121.4(2) . . ? 
C54 C53 C52 121.75(19) . . ? 
C53 C52 C51 119.73(19) . . ? 
C53 C52 C521 119.52(18) . . ? 
C51 C52 C521 120.75(18) . . ? 
C45 C44 C43 117.73(19) . . ? 
C45 C44 C441 122.0(2) . . ? 
C43 C44 C441 120.3(2) . . ? 
C996 C995 C994 119.6(2) . . ? 
C26 C261 C263 110.01(17) . . ? 
C26 C261 C262 114.29(17) . . ? 
C263 C261 C262 108.94(18) . . ? 
C13 C14 C15 121.00(18) . . ? 
C54 C55 C56 122.15(19) . . ? 
C43 C42 C41 119.4(2) . . ? 
C43 C42 C421 119.55(19) . . ? 
C41 C42 C421 121.00(18) . . ? 
C55 C56 C51 119.56(18) . . ? 
C55 C56 C561 119.39(19) . . ? 
C51 C56 C561 121.05(18) . . ? 
C52 C51 C56 118.86(18) . . ? 
C52 C51 C36 120.75(18) . . ? 
C56 C51 C36 120.18(17) . . ? 
C55 C54 C53 117.90(19) . . ? 
C55 C54 C541 120.09(19) . . ? 
C53 C54 C541 121.98(19) . . ? 
C14 C13 C12 120.67(19) . . ? 
C994 C993 C998 121.2(2) . . ? 
C44 C45 C46 122.1(2) . . ? 
C993 C994 C995 120.3(2) . . ? 
C995 C996 C997 120.4(2) . . ? 
  
_diffrn_measured_fraction_theta_max    1.000 
_diffrn_reflns_theta_full              25.00 
_diffrn_measured_fraction_theta_full   1.000 
_refine_diff_density_max    0.745 
_refine_diff_density_min   -0.343 
_refine_diff_density_rms    0.066 
  
  
data_carl43a 
  
_audit_creation_method            SHELXL-97 
_chemical_name_systematic 
; 
 ? 
; 
_chemical_name_common             ? 
_chemical_melting_point           ? 
_chemical_formula_moiety          ? 
_chemical_formula_sum 
 'C39 H64 N3 Ni Si2' 
_chemical_formula_weight          689.82 
  
loop_ 
 _atom_type_symbol 
 _atom_type_description 
 _atom_type_scat_dispersion_real 
 _atom_type_scat_dispersion_imag 
 _atom_type_scat_source 
 'C'  'C'   0.0033   0.0016 
 'International Tables Vol C Tables 4.2.6.8 and 6.1.1.4' 
 'H'  'H'   0.0000   0.0000 
 'International Tables Vol C Tables 4.2.6.8 and 6.1.1.4' 
 'N'  'N'   0.0061   0.0033 
 'International Tables Vol C Tables 4.2.6.8 and 6.1.1.4' 
 'Si'  'Si'   0.0817   0.0704 
 'International Tables Vol C Tables 4.2.6.8 and 6.1.1.4' 
 'Ni'  'Ni'   0.3393   1.1124 
 'International Tables Vol C Tables 4.2.6.8 and 6.1.1.4' 
  
_symmetry_cell_setting            Triclinic 
_symmetry_space_group_name_H-M    P-1 
  
loop_ 
 _symmetry_equiv_pos_as_xyz 
 'x, y, z' 
 '-x, -y, -z' 
  
_cell_length_a                    11.3465(15) 
_cell_length_b                    12.2307(16) 
_cell_length_c                    16.209(2) 
_cell_angle_alpha                 83.632(2) 
_cell_angle_beta                  89.161(2) 
_cell_angle_gamma                 67.459(2) 
_cell_volume                      2063.9(5) 
_cell_formula_units_Z             2 
_cell_measurement_temperature     100(2) 
_cell_measurement_reflns_used     ? 
_cell_measurement_theta_min       ? 
_cell_measurement_theta_max       ? 
  
_exptl_crystal_description        plate 
_exptl_crystal_colour             yellow 
_exptl_crystal_size_max           0.6 
_exptl_crystal_size_mid           0.2 
_exptl_crystal_size_min           0.2 
_exptl_crystal_density_meas       ? 
_exptl_crystal_density_diffrn     1.110 
_exptl_crystal_density_method     'not measured' 
_exptl_crystal_F_000              750 
_exptl_absorpt_coefficient_mu     0.556 
_exptl_absorpt_correction_type    none 
_exptl_absorpt_correction_T_min   0.2915 
_exptl_absorpt_correction_T_max   0.5502 
_exptl_absorpt_process_details    ? 
  
_exptl_special_details 
; 
 ? 
; 
  
_diffrn_ambient_temperature       100(2) 
_diffrn_radiation_wavelength      0.71073 
_diffrn_radiation_type            MoK\a 
_diffrn_radiation_source          'fine-focus sealed tube' 
_diffrn_radiation_monochromator   graphite 
_diffrn_measurement_device_type   'Bruker P4' 
_diffrn_measurement_method        '\w scans' 
_diffrn_detector_area_resol_mean  ? 
_diffrn_standards_number          ? 
_diffrn_standards_interval_count  ? 
_diffrn_standards_interval_time   ? 
_diffrn_standards_decay_%         ? 
_diffrn_reflns_number             13264 
_diffrn_reflns_av_R_equivalents   0.0876 
_diffrn_reflns_av_sigmaI/netI     0.0765 
_diffrn_reflns_limit_h_min        -14 
_diffrn_reflns_limit_h_max        15 
_diffrn_reflns_limit_k_min        -16 
_diffrn_reflns_limit_k_max        7 
_diffrn_reflns_limit_l_min        -20 
_diffrn_reflns_limit_l_max        19 
_diffrn_reflns_theta_min          1.81 
_diffrn_reflns_theta_max          28.32 
_reflns_number_total              9220 
_reflns_number_gt                 7505 
_reflns_threshold_expression      >2sigma(I) 
  
_computing_data_collection        'Bruker XSCANS' 
_computing_cell_refinement        'Bruker XSCANS' 
_computing_data_reduction         'Bruker SHELXTL' 
_computing_structure_solution     'SHELXS-97 (Sheldrick, 1990)' 
_computing_structure_refinement   'SHELXL-97 (Sheldrick, 1997)' 
_computing_molecular_graphics     'Bruker SHELXTL' 
_computing_publication_material   'Bruker SHELXTL' 
  
_refine_special_details 
; 
 Refinement of F^2^ against ALL reflections.  The weighted R-factor wR and 
 goodness of fit S are based on F^2^, conventional R-factors R are based 
 on F, with F set to zero for negative F^2^. The threshold expression of 
 F^2^ > 2sigma(F^2^) is used only for calculating R-factors(gt) etc. and is 
 not relevant to the choice of reflections for refinement.  R-factors based 
 on F^2^ are statistically about twice as large as those based on F, and R- 
 factors based on ALL data will be even larger. 
; 
  
_refine_ls_structure_factor_coef  Fsqd 
_refine_ls_matrix_type            full 
_refine_ls_weighting_scheme       calc 
_refine_ls_weighting_details 
 'calc w=1/[\s^2^(Fo^2^)+(0.0634P)^2^+0.0000P] where P=(Fo^2^+2Fc^2^)/3' 
_atom_sites_solution_primary      direct 
_atom_sites_solution_secondary    difmap 
_atom_sites_solution_hydrogens    geom 
_refine_ls_hydrogen_treatment     mixed 
_refine_ls_extinction_method      none 
_refine_ls_extinction_coef        ? 
_refine_ls_number_reflns          9220 
_refine_ls_number_parameters      427 
_refine_ls_number_restraints      0 
_refine_ls_R_factor_all           0.0561 
_refine_ls_R_factor_gt            0.0477 
_refine_ls_wR_factor_ref          0.1182 
_refine_ls_wR_factor_gt           0.1144 
_refine_ls_goodness_of_fit_ref    0.976 
_refine_ls_restrained_S_all       0.976 
_refine_ls_shift/su_max           0.001 
_refine_ls_shift/su_mean          0.000 
  
loop_ 
 _atom_site_label 
 _atom_site_type_symbol 
 _atom_site_fract_x 
 _atom_site_fract_y 
 _atom_site_fract_z 
 _atom_site_U_iso_or_equiv 
 _atom_site_adp_type 
 _atom_site_occupancy 
 _atom_site_symmetry_multiplicity 
 _atom_site_calc_flag 
 _atom_site_refinement_flags 
 _atom_site_disorder_assembly 
 _atom_site_disorder_group 
Ni1 Ni 0.77256(2) 0.72670(2) 0.744998(15) 0.01725(8) Uani 1 1 d . . . 
Si32 Si 0.91382(5) 0.85256(5) 0.84403(3) 0.02083(13) Uani 1 1 d . . . 
Si31 Si 0.96687(5) 0.82495(5) 0.65273(3) 0.02198(13) Uani 1 1 d . . . 
N1 N 0.56020(14) 0.66225(14) 0.68194(10) 0.0170(3) Uani 1 1 d . . . 
C31 C 0.85944(17) 0.84264(18) 0.73992(12) 0.0186(4) Uani 1 1 d . . . 
N2 N 0.49233(14) 0.83860(14) 0.71767(9) 0.0172(3) Uani 1 1 d . . . 
C1 C 0.60144(16) 0.73728(16) 0.71755(11) 0.0162(4) Uani 1 1 d . . . 
C21 C 0.48282(16) 0.93944(17) 0.75968(11) 0.0174(4) Uani 1 1 d . . . 
C261 C 0.53352(19) 1.03764(18) 0.62444(12) 0.0230(4) Uani 1 1 d . . . 
H26A H 0.5783 0.9543 0.6105 0.028 Uiso 1 1 calc R . . 
C22 C 0.44441(17) 0.94026(17) 0.84249(12) 0.0193(4) Uani 1 1 d . . . 
C26 C 0.51060(17) 1.03277(17) 0.71712(11) 0.0189(4) Uani 1 1 d . . . 
C121 C 0.69812(18) 0.58389(19) 0.53103(13) 0.0252(4) Uani 1 1 d . . . 
H12A H 0.6549 0.6671 0.5457 0.030 Uiso 1 1 calc R . . 
C221 C 0.41188(19) 0.84012(19) 0.88758(12) 0.0242(4) Uani 1 1 d . . . 
H22A H 0.3917 0.7961 0.8450 0.029 Uiso 1 1 calc R . . 
C25 C 0.50746(18) 1.12458(18) 0.76129(12) 0.0221(4) Uani 1 1 d . . . 
H25A H 0.5285 1.1876 0.7346 0.027 Uiso 1 1 calc R . . 
C3 C 0.38837(17) 0.82465(18) 0.68323(12) 0.0223(4) Uani 1 1 d . . . 
H3A H 0.3035 0.8824 0.6768 0.027 Uiso 1 1 calc R . . 
C2 C 0.43076(17) 0.71420(18) 0.66090(12) 0.0212(4) Uani 1 1 d . . . 
H2A H 0.3818 0.6783 0.6356 0.025 Uiso 1 1 calc R . . 
C24 C 0.47395(18) 1.12555(18) 0.84397(12) 0.0238(4) Uani 1 1 d . . . 
H24A H 0.4740 1.1883 0.8737 0.029 Uiso 1 1 calc R . . 
N41 N 0.95025(16) 0.47082(16) 0.78850(12) 0.0287(4) Uani 1 1 d . . . 
C23 C 0.44046(18) 1.03589(18) 0.88345(12) 0.0226(4) Uani 1 1 d . . . 
H23A H 0.4144 1.0396 0.9394 0.027 Uiso 1 1 calc R . . 
C16 C 0.63250(18) 0.45685(18) 0.74753(13) 0.0222(4) Uani 1 1 d . . . 
C36 C 0.8029(2) 0.8331(2) 0.92596(13) 0.0308(5) Uani 1 1 d . . . 
H36A H 0.8057 0.7516 0.9300 0.046 Uiso 1 1 calc R . . 
H36B H 0.7157 0.8897 0.9112 0.046 Uiso 1 1 calc R . . 
H36C H 0.8293 0.8479 0.9795 0.046 Uiso 1 1 calc R . . 
C122 C 0.6256(2) 0.5695(2) 0.45665(14) 0.0315(5) Uani 1 1 d . . . 
H12B H 0.5358 0.5893 0.4702 0.047 Uiso 1 1 calc R . . 
H12C H 0.6634 0.4869 0.4437 0.047 Uiso 1 1 calc R . . 
H12D H 0.6311 0.6231 0.4084 0.047 Uiso 1 1 calc R . . 
C35 C 0.9184(2) 1.0029(2) 0.85513(15) 0.0349(5) Uani 1 1 d . . . 
H35A H 0.9782 1.0179 0.8157 0.052 Uiso 1 1 calc R . . 
H35B H 0.9464 1.0038 0.9119 0.052 Uiso 1 1 calc R . . 
H35C H 0.8330 1.0649 0.8436 0.052 Uiso 1 1 calc R . . 
C262 C 0.6138(2) 1.1089(2) 0.59506(13) 0.0287(5) Uani 1 1 d . . . 
H26B H 0.6949 1.0773 0.6270 0.043 Uiso 1 1 calc R . . 
H26C H 0.5675 1.1927 0.6033 0.043 Uiso 1 1 calc R . . 
H26D H 0.6308 1.1025 0.5360 0.043 Uiso 1 1 calc R . . 
C12 C 0.69654(18) 0.49812(19) 0.60599(13) 0.0232(4) Uani 1 1 d . . . 
C33 C 1.0393(2) 0.9415(2) 0.63677(16) 0.0351(5) Uani 1 1 d . . . 
H33A H 1.0864 0.9397 0.6874 0.053 Uiso 1 1 calc R . . 
H33B H 0.9712 1.0205 0.6242 0.053 Uiso 1 1 calc R . . 
H33C H 1.0977 0.9247 0.5905 0.053 Uiso 1 1 calc R . . 
C15 C 0.6980(2) 0.33582(19) 0.74219(14) 0.0290(5) Uani 1 1 d . . . 
H15A H 0.6987 0.2800 0.7881 0.035 Uiso 1 1 calc R . . 
C41 C 0.87584(18) 0.56729(19) 0.77213(13) 0.0252(4) Uani 1 1 d . . . 
C11 C 0.63327(17) 0.53663(17) 0.67813(12) 0.0200(4) Uani 1 1 d . . . 
C161 C 0.5624(2) 0.4989(2) 0.82570(13) 0.0269(5) Uani 1 1 d . . . 
H16A H 0.5388 0.5869 0.8225 0.032 Uiso 1 1 calc R . . 
C222 C 0.5273(2) 0.7523(2) 0.94084(13) 0.0288(5) Uani 1 1 d . . . 
H22B H 0.5996 0.7183 0.9050 0.043 Uiso 1 1 calc R . . 
H22C H 0.5053 0.6883 0.9697 0.043 Uiso 1 1 calc R . . 
H22D H 0.5507 0.7944 0.9817 0.043 Uiso 1 1 calc R . . 
C32 C 0.8839(2) 0.8361(2) 0.55075(14) 0.0339(5) Uani 1 1 d . . . 
H32A H 0.8339 0.7859 0.5565 0.051 Uiso 1 1 calc R . . 
H32B H 0.9476 0.8092 0.5082 0.051 Uiso 1 1 calc R . . 
H32C H 0.8269 0.9191 0.5344 0.051 Uiso 1 1 calc R . . 
C42 C 1.05919(19) 0.35815(19) 0.80932(14) 0.0290(5) Uani 1 1 d . . . 
C14 C 0.7618(2) 0.29525(19) 0.67193(15) 0.0321(5) Uani 1 1 d . . . 
H14A H 0.8060 0.2122 0.6697 0.039 Uiso 1 1 calc R . . 
C37 C 1.0769(2) 0.7369(2) 0.87508(14) 0.0328(5) Uani 1 1 d . . . 
H37A H 1.0788 0.6577 0.8678 0.049 Uiso 1 1 calc R . . 
H37B H 1.0958 0.7396 0.9334 0.049 Uiso 1 1 calc R . . 
H37C H 1.1409 0.7531 0.8401 0.049 Uiso 1 1 calc R . . 
C34 C 1.1049(2) 0.6766(2) 0.66339(15) 0.0338(5) Uani 1 1 d . . . 
H34A H 1.0726 0.6126 0.6669 0.051 Uiso 1 1 calc R . . 
H34B H 1.1554 0.6685 0.7139 0.051 Uiso 1 1 calc R . . 
H34C H 1.1588 0.6713 0.6150 0.051 Uiso 1 1 calc R . . 
C13 C 0.7615(2) 0.37571(19) 0.60426(14) 0.0287(5) Uani 1 1 d . . . 
H13A H 0.8062 0.3470 0.5561 0.034 Uiso 1 1 calc R . . 
C263 C 0.4028(2) 1.0918(2) 0.57814(13) 0.0307(5) Uani 1 1 d . . . 
H26E H 0.3553 1.0405 0.5921 0.046 Uiso 1 1 calc R . . 
H26F H 0.4154 1.0983 0.5181 0.046 Uiso 1 1 calc R . . 
H26G H 0.3544 1.1712 0.5947 0.046 Uiso 1 1 calc R . . 
C162 C 0.4384(2) 0.4760(2) 0.83018(17) 0.0403(6) Uani 1 1 d . . . 
H16B H 0.3837 0.5186 0.7813 0.060 Uiso 1 1 calc R . . 
H16C H 0.3937 0.5045 0.8805 0.060 Uiso 1 1 calc R . . 
H16D H 0.4587 0.3904 0.8316 0.060 Uiso 1 1 calc R . . 
C123 C 0.8359(2) 0.5640(2) 0.50902(15) 0.0356(5) Uani 1 1 d . . . 
H12E H 0.8819 0.5698 0.5580 0.053 Uiso 1 1 calc R . . 
H12F H 0.8361 0.6247 0.4642 0.053 Uiso 1 1 calc R . . 
H12G H 0.8780 0.4847 0.4908 0.053 Uiso 1 1 calc R . . 
C223 C 0.2954(2) 0.8866(2) 0.94236(16) 0.0374(6) Uani 1 1 d . . . 
H22E H 0.2227 0.9444 0.9085 0.056 Uiso 1 1 calc R . . 
H22F H 0.3154 0.9251 0.9870 0.056 Uiso 1 1 calc R . . 
H22G H 0.2737 0.8198 0.9665 0.056 Uiso 1 1 calc R . . 
C43 C 1.1517(2) 0.3823(2) 0.86417(18) 0.0414(6) Uani 1 1 d . . . 
H43A H 1.1086 0.4142 0.9142 0.062 Uiso 1 1 calc R . . 
H43B H 1.1812 0.4404 0.8337 0.062 Uiso 1 1 calc R . . 
H43C H 1.2250 0.3080 0.8801 0.062 Uiso 1 1 calc R . . 
C163 C 0.6463(2) 0.4410(2) 0.90413(14) 0.0376(6) Uani 1 1 d . . . 
H16E H 0.7237 0.4584 0.9005 0.056 Uiso 1 1 calc R . . 
H16F H 0.6698 0.3545 0.9092 0.056 Uiso 1 1 calc R . . 
H16G H 0.5990 0.4728 0.9529 0.056 Uiso 1 1 calc R . . 
C44 C 1.1190(3) 0.3159(3) 0.72848(17) 0.0545(8) Uani 1 1 d . . . 
H44A H 1.1513 0.3737 0.7007 0.082 Uiso 1 1 calc R . . 
H44B H 1.0547 0.3083 0.6924 0.082 Uiso 1 1 calc R . . 
H44C H 1.1897 0.2383 0.7401 0.082 Uiso 1 1 calc R . . 
C45 C 1.0101(2) 0.2698(2) 0.85543(17) 0.0413(6) Uani 1 1 d . . . 
H45A H 0.9742 0.2983 0.9080 0.062 Uiso 1 1 calc R . . 
H45B H 1.0806 0.1920 0.8667 0.062 Uiso 1 1 calc R . . 
H45C H 0.9437 0.2620 0.8213 0.062 Uiso 1 1 calc R . . 
H H 0.795(2) 0.907(2) 0.7258(15) 0.033(7) Uiso 1 1 d . . . 
  
loop_ 
 _atom_site_aniso_label 
 _atom_site_aniso_U_11 
 _atom_site_aniso_U_22 
 _atom_site_aniso_U_33 
 _atom_site_aniso_U_23 
 _atom_site_aniso_U_13 
 _atom_site_aniso_U_12 
Ni1 0.01696(13) 0.01927(14) 0.01598(13) -0.00102(9) -0.00257(9) -0.00761(10) 
Si32 0.0216(3) 0.0216(3) 0.0197(3) -0.0028(2) -0.0037(2) -0.0083(2) 
Si31 0.0196(2) 0.0269(3) 0.0206(3) -0.0038(2) 0.0002(2) -0.0100(2) 
N1 0.0180(7) 0.0190(8) 0.0155(8) -0.0025(6) -0.0006(6) -0.0085(6) 
C31 0.0154(8) 0.0195(10) 0.0197(10) -0.0010(8) -0.0026(7) -0.0056(8) 
N2 0.0195(7) 0.0181(8) 0.0141(7) -0.0033(6) -0.0016(6) -0.0069(6) 
C1 0.0206(8) 0.0174(9) 0.0105(8) -0.0002(7) 0.0011(7) -0.0079(7) 
C21 0.0152(8) 0.0183(9) 0.0164(9) -0.0038(7) -0.0039(7) -0.0032(7) 
C261 0.0303(10) 0.0234(10) 0.0139(9) -0.0016(8) -0.0036(8) -0.0086(8) 
C22 0.0182(8) 0.0212(10) 0.0155(9) -0.0025(7) -0.0025(7) -0.0041(7) 
C26 0.0184(8) 0.0204(10) 0.0146(9) -0.0015(7) -0.0049(7) -0.0037(7) 
C121 0.0277(10) 0.0267(11) 0.0215(10) -0.0075(8) 0.0055(8) -0.0097(9) 
C221 0.0297(10) 0.0281(11) 0.0179(10) -0.0048(8) 0.0016(8) -0.0138(9) 
C25 0.0252(9) 0.0195(10) 0.0201(10) -0.0006(8) -0.0048(8) -0.0070(8) 
C3 0.0169(8) 0.0270(11) 0.0219(10) -0.0052(8) -0.0049(7) -0.0064(8) 
C2 0.0201(9) 0.0251(10) 0.0208(10) -0.0044(8) -0.0021(7) -0.0107(8) 
C24 0.0290(10) 0.0220(10) 0.0201(10) -0.0072(8) -0.0046(8) -0.0081(8) 
N41 0.0260(9) 0.0260(10) 0.0307(10) 0.0033(8) -0.0019(7) -0.0079(8) 
C23 0.0252(9) 0.0255(11) 0.0148(9) -0.0055(8) -0.0017(7) -0.0064(8) 
C16 0.0228(9) 0.0219(10) 0.0244(10) -0.0017(8) -0.0024(8) -0.0115(8) 
C36 0.0321(11) 0.0390(13) 0.0209(10) -0.0034(9) -0.0011(9) -0.0131(10) 
C122 0.0319(11) 0.0309(12) 0.0288(12) -0.0047(9) -0.0018(9) -0.0084(9) 
C35 0.0475(13) 0.0290(12) 0.0328(12) -0.0080(10) -0.0033(10) -0.0185(11) 
C262 0.0353(11) 0.0294(12) 0.0193(10) 0.0022(9) -0.0005(9) -0.0113(9) 
C12 0.0228(9) 0.0252(11) 0.0241(10) -0.0075(8) 0.0015(8) -0.0107(8) 
C33 0.0309(11) 0.0406(14) 0.0404(14) -0.0057(11) 0.0084(10) -0.0211(10) 
C15 0.0338(11) 0.0230(11) 0.0320(12) 0.0013(9) -0.0050(9) -0.0138(9) 
C41 0.0231(9) 0.0282(11) 0.0248(11) 0.0013(9) -0.0030(8) -0.0115(9) 
C11 0.0184(8) 0.0205(10) 0.0228(10) -0.0042(8) -0.0028(7) -0.0087(8) 
C161 0.0329(10) 0.0257(11) 0.0227(10) 0.0013(8) 0.0024(8) -0.0132(9) 
C222 0.0378(11) 0.0296(12) 0.0196(10) 0.0012(9) -0.0002(9) -0.0148(10) 
C32 0.0329(11) 0.0464(14) 0.0229(11) -0.0067(10) -0.0001(9) -0.0152(10) 
C42 0.0254(10) 0.0222(11) 0.0323(12) 0.0027(9) -0.0036(9) -0.0027(8) 
C14 0.0326(11) 0.0184(11) 0.0420(13) -0.0070(9) -0.0065(10) -0.0050(9) 
C37 0.0284(10) 0.0367(13) 0.0301(12) -0.0060(10) -0.0106(9) -0.0080(10) 
C34 0.0256(10) 0.0371(13) 0.0333(12) -0.0086(10) 0.0041(9) -0.0050(9) 
C13 0.0303(10) 0.0267(11) 0.0295(11) -0.0118(9) 0.0032(9) -0.0091(9) 
C263 0.0376(12) 0.0364(13) 0.0172(10) 0.0005(9) -0.0103(9) -0.0137(10) 
C162 0.0342(12) 0.0422(14) 0.0459(15) -0.0004(12) 0.0079(11) -0.0176(11) 
C123 0.0332(11) 0.0485(15) 0.0290(12) -0.0071(10) 0.0060(9) -0.0195(11) 
C223 0.0365(12) 0.0403(14) 0.0404(14) -0.0085(11) 0.0116(10) -0.0197(11) 
C43 0.0288(11) 0.0301(13) 0.0595(17) 0.0028(12) -0.0141(11) -0.0064(10) 
C163 0.0410(12) 0.0438(14) 0.0237(11) 0.0040(10) 0.0016(10) -0.0137(11) 
C44 0.0546(16) 0.0454(16) 0.0395(15) -0.0030(12) 0.0041(13) 0.0065(13) 
C45 0.0402(12) 0.0301(13) 0.0510(16) 0.0130(12) -0.0161(11) -0.0148(11) 
  
_geom_special_details 
; 
 All esds (except the esd in the dihedral angle between two l.s. planes) 
 are estimated using the full covariance matrix.  The cell esds are taken 
 into account individually in the estimation of esds in distances, angles 
 and torsion angles; correlations between esds in cell parameters are only 
 used when they are defined by crystal symmetry.  An approximate (isotropic) 
 treatment of cell esds is used for estimating esds involving l.s. planes. 
; 
  
loop_ 
 _geom_bond_atom_site_label_1 
 _geom_bond_atom_site_label_2 
 _geom_bond_distance 
 _geom_bond_site_symmetry_2 
 _geom_bond_publ_flag 
Ni1 C41 1.855(2) . ? 
Ni1 C1 1.9505(18) . ? 
Ni1 C31 2.0082(19) . ? 
Si32 C31 1.837(2) . ? 
Si32 C36 1.875(2) . ? 
Si32 C37 1.882(2) . ? 
Si32 C35 1.887(2) . ? 
Si31 C31 1.829(2) . ? 
Si31 C32 1.880(2) . ? 
Si31 C34 1.880(2) . ? 
Si31 C33 1.893(2) . ? 
N1 C1 1.360(2) . ? 
N1 C2 1.389(2) . ? 
N1 C11 1.447(3) . ? 
N2 C1 1.376(2) . ? 
N2 C3 1.388(2) . ? 
N2 C21 1.442(2) . ? 
C21 C26 1.405(3) . ? 
C21 C22 1.405(3) . ? 
C261 C26 1.519(3) . ? 
C261 C262 1.523(3) . ? 
C261 C263 1.540(3) . ? 
C22 C23 1.394(3) . ? 
C22 C221 1.520(3) . ? 
C26 C25 1.386(3) . ? 
C121 C12 1.519(3) . ? 
C121 C123 1.531(3) . ? 
C121 C122 1.533(3) . ? 
C221 C223 1.536(3) . ? 
C221 C222 1.537(3) . ? 
C25 C24 1.388(3) . ? 
C3 C2 1.339(3) . ? 
C24 C23 1.383(3) . ? 
N41 C41 1.161(3) . ? 
N41 C42 1.464(3) . ? 
C16 C15 1.391(3) . ? 
C16 C11 1.407(3) . ? 
C16 C161 1.518(3) . ? 
C12 C11 1.394(3) . ? 
C12 C13 1.396(3) . ? 
C15 C14 1.376(3) . ? 
C161 C163 1.530(3) . ? 
C161 C162 1.536(3) . ? 
C42 C44 1.517(4) . ? 
C42 C43 1.518(3) . ? 
C42 C45 1.519(3) . ? 
C14 C13 1.389(3) . ? 
  
loop_ 
 _geom_angle_atom_site_label_1 
 _geom_angle_atom_site_label_2 
 _geom_angle_atom_site_label_3 
 _geom_angle 
 _geom_angle_site_symmetry_1 
 _geom_angle_site_symmetry_3 
 _geom_angle_publ_flag 
C41 Ni1 C1 108.23(8) . . ? 
C41 Ni1 C31 116.35(8) . . ? 
C1 Ni1 C31 135.12(8) . . ? 
C31 Si32 C36 111.72(9) . . ? 
C31 Si32 C37 113.22(10) . . ? 
C36 Si32 C37 106.55(10) . . ? 
C31 Si32 C35 112.83(10) . . ? 
C36 Si32 C35 104.60(11) . . ? 
C37 Si32 C35 107.35(11) . . ? 
C31 Si31 C32 112.38(9) . . ? 
C31 Si31 C34 112.77(10) . . ? 
C32 Si31 C34 106.04(11) . . ? 
C31 Si31 C33 114.17(10) . . ? 
C32 Si31 C33 104.71(11) . . ? 
C34 Si31 C33 106.06(11) . . ? 
C1 N1 C2 112.18(16) . . ? 
C1 N1 C11 125.38(15) . . ? 
C2 N1 C11 121.66(16) . . ? 
Si31 C31 Si32 120.30(10) . . ? 
Si31 C31 Ni1 111.56(10) . . ? 
Si32 C31 Ni1 110.81(9) . . ? 
C1 N2 C3 111.56(16) . . ? 
C1 N2 C21 123.97(15) . . ? 
C3 N2 C21 123.83(15) . . ? 
N1 C1 N2 102.81(14) . . ? 
N1 C1 Ni1 131.66(14) . . ? 
N2 C1 Ni1 124.67(14) . . ? 
C26 C21 C22 122.55(18) . . ? 
C26 C21 N2 119.65(17) . . ? 
C22 C21 N2 117.80(17) . . ? 
C26 C261 C262 114.01(17) . . ? 
C26 C261 C263 108.12(16) . . ? 
C262 C261 C263 109.63(16) . . ? 
C23 C22 C21 117.25(18) . . ? 
C23 C22 C221 120.48(18) . . ? 
C21 C22 C221 122.24(18) . . ? 
C25 C26 C21 117.69(18) . . ? 
C25 C26 C261 121.03(17) . . ? 
C21 C26 C261 121.12(18) . . ? 
C12 C121 C123 110.03(17) . . ? 
C12 C121 C122 110.92(18) . . ? 
C123 C121 C122 110.63(18) . . ? 
C22 C221 C223 112.35(18) . . ? 
C22 C221 C222 110.15(16) . . ? 
C223 C221 C222 109.71(18) . . ? 
C26 C25 C24 120.82(19) . . ? 
C2 C3 N2 106.81(17) . . ? 
C3 C2 N1 106.64(17) . . ? 
C23 C24 C25 120.5(2) . . ? 
C41 N41 C42 170.7(2) . . ? 
C24 C23 C22 121.05(19) . . ? 
C15 C16 C11 117.5(2) . . ? 
C15 C16 C161 120.23(18) . . ? 
C11 C16 C161 122.24(18) . . ? 
C11 C12 C13 117.71(19) . . ? 
C11 C12 C121 122.55(18) . . ? 
C13 C12 C121 119.74(19) . . ? 
C14 C15 C16 121.4(2) . . ? 
N41 C41 Ni1 173.50(18) . . ? 
C12 C11 C16 122.34(19) . . ? 
C12 C11 N1 119.92(17) . . ? 
C16 C11 N1 117.68(17) . . ? 
C16 C161 C163 111.97(18) . . ? 
C16 C161 C162 110.4(2) . . ? 
C163 C161 C162 110.88(18) . . ? 
N41 C42 C44 107.46(18) . . ? 
N41 C42 C43 107.60(19) . . ? 
C44 C42 C43 111.5(2) . . ? 
N41 C42 C45 108.10(17) . . ? 
C44 C42 C45 111.3(2) . . ? 
C43 C42 C45 110.74(19) . . ? 
C15 C14 C13 120.0(2) . . ? 
C14 C13 C12 121.0(2) . . ? 
  
_diffrn_measured_fraction_theta_max    0.896 
_diffrn_reflns_theta_full              25.00 
_diffrn_measured_fraction_theta_full   0.988 
_refine_diff_density_max    1.024 
_refine_diff_density_min   -0.613 
_refine_diff_density_rms    0.087 


data_sad02 
  
_audit_creation_method            SHELXL-97 
_chemical_name_systematic 
; 
 ? 
; 
_chemical_name_common             ? 
_chemical_melting_point           ? 
_chemical_formula_moiety          ? 
_chemical_formula_sum 
 'C37 H58 Br N2 Ni Si2' 
_chemical_formula_weight          725.65 
  
loop_ 
 _atom_type_symbol 
 _atom_type_description 
 _atom_type_scat_dispersion_real 
 _atom_type_scat_dispersion_imag 
 _atom_type_scat_source 
 'C'  'C'   0.0033   0.0016 
 'International Tables Vol C Tables 4.2.6.8 and 6.1.1.4' 
 'H'  'H'   0.0000   0.0000 
 'International Tables Vol C Tables 4.2.6.8 and 6.1.1.4' 
 'N'  'N'   0.0061   0.0033 
 'International Tables Vol C Tables 4.2.6.8 and 6.1.1.4' 
 'Si'  'Si'   0.0817   0.0704 
 'International Tables Vol C Tables 4.2.6.8 and 6.1.1.4' 
 'Ni'  'Ni'   0.3393   1.1124 
 'International Tables Vol C Tables 4.2.6.8 and 6.1.1.4' 
 'Br'  'Br'  -0.2901   2.4595 
 'International Tables Vol C Tables 4.2.6.8 and 6.1.1.4' 
  
_symmetry_cell_setting            Monoclinic 
_symmetry_space_group_name_H-M    P2(1)/c 
  
loop_ 
 _symmetry_equiv_pos_as_xyz 
 'x, y, z' 
 '-x, y+1/2, -z+1/2' 
 '-x, -y, -z' 
 'x, -y-1/2, z-1/2' 
  
_cell_length_a                    12.369(3) 
_cell_length_b                    16.924(3) 
_cell_length_c                    18.452(4) 
_cell_angle_alpha                 90.00 
_cell_angle_beta                  108.08(3) 
_cell_angle_gamma                 90.00 
_cell_volume                      3671.8(13) 
_cell_formula_units_Z             4 
_cell_measurement_temperature     153(2) 
_cell_measurement_reflns_used     ? 
_cell_measurement_theta_min       ? 
_cell_measurement_theta_max       ? 
  
_exptl_crystal_description        plate 
_exptl_crystal_colour             blue 
_exptl_crystal_size_max           0.40 
_exptl_crystal_size_mid           0.40 
_exptl_crystal_size_min           0.20 
_exptl_crystal_density_meas       ? 
_exptl_crystal_density_diffrn     1.313 
_exptl_crystal_density_method     'not measured' 
_exptl_crystal_F_000              1540 
_exptl_absorpt_coefficient_mu     1.709 
_exptl_absorpt_correction_type    empirical
_exptl_absorpt_correction_T_min   0.5480 
_exptl_absorpt_correction_T_max   0.7262 
_exptl_absorpt_process_details    SADABS
  
_exptl_special_details 
; 
 ? 
; 
  
_diffrn_ambient_temperature       153(2) 
_diffrn_radiation_wavelength      0.71073 
_diffrn_radiation_type            MoK\a 
_diffrn_radiation_source          'fine-focus sealed tube' 
_diffrn_radiation_monochromator   graphite 
_diffrn_measurement_device_type   'Bruker P4' 
_diffrn_measurement_method        '\w scans' 
_diffrn_detector_area_resol_mean  ? 
_diffrn_standards_number          ? 
_diffrn_standards_interval_count  ? 
_diffrn_standards_interval_time   ? 
_diffrn_standards_decay_%         ? 
_diffrn_reflns_number             18060 
_diffrn_reflns_av_R_equivalents   0.1494 
_diffrn_reflns_av_sigmaI/netI     0.2097 
_diffrn_reflns_limit_h_min        -14 
_diffrn_reflns_limit_h_max        10 
_diffrn_reflns_limit_k_min        -19 
_diffrn_reflns_limit_k_max        20 
_diffrn_reflns_limit_l_min        -22 
_diffrn_reflns_limit_l_max        22 
_diffrn_reflns_theta_min          1.67 
_diffrn_reflns_theta_max          25.49 
_reflns_number_total              6586 
_reflns_number_gt                 3570 
_reflns_threshold_expression      >2sigma(I) 
  
_computing_data_collection        'Bruker XSCANS' 
_computing_cell_refinement        'Bruker XSCANS' 
_computing_data_reduction         'Bruker SHELXTL' 
_computing_structure_solution     'SHELXS-97 (Sheldrick, 1990)' 
_computing_structure_refinement   'SHELXL-97 (Sheldrick, 1997)' 
_computing_molecular_graphics     'Bruker SHELXTL' 
_computing_publication_material   'Bruker SHELXTL' 
  
_refine_special_details 
; 
 Refinement of F^2^ against ALL reflections.  The weighted R-factor wR and 
 goodness of fit S are based on F^2^, conventional R-factors R are based 
 on F, with F set to zero for negative F^2^. The threshold expression of 
 F^2^ > 2sigma(F^2^) is used only for calculating R-factors(gt) etc. and is 
 not relevant to the choice of reflections for refinement.  R-factors based 
 on F^2^ are statistically about twice as large as those based on F, and R- 
 factors based on ALL data will be even larger. 
; 
  
_refine_ls_structure_factor_coef  Fsqd 
_refine_ls_matrix_type            full 
_refine_ls_weighting_scheme       calc 
_refine_ls_weighting_details 
 'calc w=1/[\s^2^(Fo^2^)+(0.0266P)^2^+16.1054P] where P=(Fo^2^+2Fc^2^)/3' 
_atom_sites_solution_primary      direct 
_atom_sites_solution_secondary    difmap 
_atom_sites_solution_hydrogens    geom 
_refine_ls_hydrogen_treatment     mixed 
_refine_ls_extinction_method      none 
_refine_ls_extinction_coef        ? 
_refine_ls_number_reflns          6586 
_refine_ls_number_parameters      402 
_refine_ls_number_restraints      0 
_refine_ls_R_factor_all           0.1833 
_refine_ls_R_factor_gt            0.1001 
_refine_ls_wR_factor_ref          0.2028 
_refine_ls_wR_factor_gt           0.1731 
_refine_ls_goodness_of_fit_ref    1.021 
_refine_ls_restrained_S_all       1.021 
_refine_ls_shift/su_max           0.008 
_refine_ls_shift/su_mean          0.001 
  
loop_ 
 _atom_site_label 
 _atom_site_type_symbol 
 _atom_site_fract_x 
 _atom_site_fract_y 
 _atom_site_fract_z 
 _atom_site_U_iso_or_equiv 
 _atom_site_adp_type 
 _atom_site_occupancy 
 _atom_site_symmetry_multiplicity 
 _atom_site_calc_flag 
 _atom_site_refinement_flags 
 _atom_site_disorder_assembly 
 _atom_site_disorder_group 
Ni1 Ni 0.35618(10) 0.32794(7) 0.22960(6) 0.0246(3) Uani 1 1 d . . . 
Br1 Br 0.40419(9) 0.22430(6) 0.17009(6) 0.0415(3) Uani 1 1 d . . . 
Si1 Si 0.2345(2) 0.29777(15) 0.34810(14) 0.0280(7) Uani 1 1 d . . . 
Si2 Si 0.1092(2) 0.29202(16) 0.16963(14) 0.0279(7) Uani 1 1 d . . . 
N1 N 0.3600(6) 0.4988(4) 0.2502(4) 0.0214(17) Uani 1 1 d . . . 
N2 N 0.5142(6) 0.4390(4) 0.3119(4) 0.0259(18) Uani 1 1 d . . . 
C1 C 0.4052(8) 0.4267(5) 0.2648(5) 0.023(2) Uani 1 1 d . . . 
C2 C 0.4385(8) 0.5563(5) 0.2853(5) 0.026(2) Uani 1 1 d . . . 
H2 H 0.4270 0.6106 0.2835 0.032 Uiso 1 1 calc R . . 
C3 C 0.5320(8) 0.5186(6) 0.3216(5) 0.027(2) Uani 1 1 d . . . 
H3 H 0.6000 0.5423 0.3495 0.033 Uiso 1 1 calc R . . 
C4 C 0.6294(8) 0.3371(5) 0.3945(5) 0.028(2) Uani 1 1 d . . . 
C5 C 0.6013(7) 0.3810(5) 0.3263(5) 0.021(2) Uani 1 1 d . . . 
C6 C 0.7434(8) 0.3151(6) 0.2885(6) 0.036(3) Uani 1 1 d . . . 
H6 H 0.7816 0.3063 0.2531 0.043 Uiso 1 1 calc R . . 
C7 C 0.7127(8) 0.2805(6) 0.4048(5) 0.034(2) Uani 1 1 d . . . 
H7 H 0.7309 0.2486 0.4479 0.040 Uiso 1 1 calc R . . 
C8 C 0.6419(7) 0.4247(5) 0.2074(5) 0.022(2) Uani 1 1 d . . . 
H8 H 0.5729 0.4556 0.2023 0.027 Uiso 1 1 calc R . . 
C9 C 0.7404(8) 0.4824(6) 0.2181(5) 0.037(3) Uani 1 1 d . . . 
H9A H 0.7483 0.5140 0.2627 0.056 Uiso 1 1 calc R . . 
H9B H 0.7254 0.5161 0.1743 0.056 Uiso 1 1 calc R . . 
H9C H 0.8094 0.4535 0.2243 0.056 Uiso 1 1 calc R . . 
C10 C 0.7687(8) 0.2707(6) 0.3525(6) 0.038(3) Uani 1 1 d . . . 
H10 H 0.8256 0.2328 0.3611 0.046 Uiso 1 1 calc R . . 
C11 C 0.6236(8) 0.3785(6) 0.1346(5) 0.039(3) Uani 1 1 d . . . 
H11A H 0.6930 0.3525 0.1357 0.058 Uiso 1 1 calc R . . 
H11B H 0.6009 0.4139 0.0919 0.058 Uiso 1 1 calc R . . 
H11C H 0.5652 0.3397 0.1301 0.058 Uiso 1 1 calc R . . 
C12 C 0.5714(8) 0.3523(5) 0.4530(5) 0.033(2) Uani 1 1 d . . . 
H12 H 0.4907 0.3614 0.4257 0.039 Uiso 1 1 calc R . . 
C13 C 0.6171(9) 0.4268(5) 0.4984(5) 0.037(3) Uani 1 1 d . . . 
H13A H 0.6966 0.4203 0.5250 0.056 Uiso 1 1 calc R . . 
H13B H 0.5768 0.4361 0.5344 0.056 Uiso 1 1 calc R . . 
H13C H 0.6066 0.4710 0.4643 0.056 Uiso 1 1 calc R . . 
C14 C 0.5780(8) 0.2857(6) 0.5077(5) 0.037(3) Uani 1 1 d . . . 
H14A H 0.5490 0.2383 0.4798 0.055 Uiso 1 1 calc R . . 
H14B H 0.5334 0.2984 0.5404 0.055 Uiso 1 1 calc R . . 
H14C H 0.6557 0.2777 0.5379 0.055 Uiso 1 1 calc R . . 
C15 C 0.6617(8) 0.3732(5) 0.2752(5) 0.025(2) Uani 1 1 d . . . 
C16 C 0.2542(8) 0.5184(5) 0.1935(5) 0.027(2) Uani 1 1 d . . . 
C17 C 0.2476(8) 0.5170(5) 0.1168(5) 0.024(2) Uani 1 1 d . . . 
C18 C 0.3466(8) 0.4975(5) 0.0917(5) 0.030(2) Uani 1 1 d . . . 
H18 H 0.3927 0.4596 0.1286 0.037 Uiso 1 1 calc R . . 
C19 C 0.1730(8) 0.5514(5) 0.3007(5) 0.027(2) Uani 1 1 d . . . 
H19 H 0.2431 0.5253 0.3312 0.032 Uiso 1 1 calc R . . 
C20 C 0.1649(7) 0.5428(5) 0.2181(5) 0.026(2) Uani 1 1 d . . . 
C21 C 0.0745(7) 0.5129(5) 0.3198(5) 0.027(2) Uani 1 1 d . . . 
H21A H 0.0052 0.5399 0.2934 0.041 Uiso 1 1 calc R . . 
H21B H 0.0872 0.5158 0.3737 0.041 Uiso 1 1 calc R . . 
H21C H 0.0687 0.4585 0.3042 0.041 Uiso 1 1 calc R . . 
C22 C 0.0577(9) 0.5642(5) 0.0887(5) 0.034(3) Uani 1 1 d . . . 
H22 H -0.0105 0.5785 0.0525 0.041 Uiso 1 1 calc R . . 
C23 C 0.1822(8) 0.6390(5) 0.3221(5) 0.031(2) Uani 1 1 d . . . 
H23A H 0.2476 0.6614 0.3123 0.047 Uiso 1 1 calc R . . 
H23B H 0.1897 0.6445 0.3752 0.047 Uiso 1 1 calc R . . 
H23C H 0.1150 0.6661 0.2922 0.047 Uiso 1 1 calc R . . 
C24 C 0.3163(9) 0.4584(6) 0.0142(5) 0.045(3) Uani 1 1 d . . . 
H24A H 0.2758 0.4101 0.0151 0.067 Uiso 1 1 calc R . . 
H24B H 0.3846 0.4469 0.0019 0.067 Uiso 1 1 calc R . . 
H24C H 0.2691 0.4932 -0.0235 0.067 Uiso 1 1 calc R . . 
C25 C 0.0662(7) 0.5657(5) 0.1642(5) 0.027(2) Uani 1 1 d . . . 
H25 H 0.0047 0.5824 0.1792 0.032 Uiso 1 1 calc R . . 
C26 C 0.1473(9) 0.5422(6) 0.0657(5) 0.032(2) Uani 1 1 d . . . 
H26 H 0.1406 0.5441 0.0141 0.038 Uiso 1 1 calc R . . 
C27 C 0.4208(8) 0.5684(6) 0.0929(5) 0.040(3) Uani 1 1 d . . . 
H27A H 0.3768 0.6089 0.0605 0.060 Uiso 1 1 calc R . . 
H27B H 0.4829 0.5534 0.0750 0.060 Uiso 1 1 calc R . . 
H27C H 0.4501 0.5881 0.1441 0.060 Uiso 1 1 calc R . . 
C28 C 0.2164(7) 0.3387(5) 0.2514(4) 0.022(2) Uani 1 1 d . . . 
H28 H 0.1986 0.3951 0.2518 0.026 Uiso 1 1 calc R . . 
C29 C 0.2834(8) 0.3751(5) 0.4225(5) 0.033(2) Uani 1 1 d . . . 
H29A H 0.3178 0.3506 0.4711 0.050 Uiso 1 1 calc R . . 
H29B H 0.2195 0.4063 0.4245 0.050 Uiso 1 1 calc R . . 
H29C H 0.3380 0.4085 0.4103 0.050 Uiso 1 1 calc R . . 
C30 C 0.3305(8) 0.2126(5) 0.3675(5) 0.037(3) Uani 1 1 d . . . 
H30A H 0.2963 0.1702 0.3335 0.056 Uiso 1 1 calc R . . 
H30B H 0.3445 0.1957 0.4192 0.056 Uiso 1 1 calc R . . 
H30C H 0.4011 0.2272 0.3597 0.056 Uiso 1 1 calc R . . 
C31 C 0.0988(8) 0.2651(6) 0.3598(5) 0.039(3) Uani 1 1 d . . . 
H31A H 0.0689 0.2218 0.3259 0.058 Uiso 1 1 calc R . . 
H31B H 0.0456 0.3081 0.3482 0.058 Uiso 1 1 calc R . . 
H31C H 0.1113 0.2483 0.4115 0.058 Uiso 1 1 calc R . . 
C32 C 0.1101(8) 0.1849(5) 0.1774(5) 0.034(2) Uani 1 1 d . . . 
H32A H 0.0497 0.1633 0.1360 0.051 Uiso 1 1 calc R . . 
H32B H 0.0993 0.1701 0.2249 0.051 Uiso 1 1 calc R . . 
H32C H 0.1817 0.1648 0.1755 0.051 Uiso 1 1 calc R . . 
C33 C -0.0325(7) 0.3326(6) 0.1666(5) 0.039(3) Uani 1 1 d . . . 
H33A H -0.0907 0.3085 0.1255 0.059 Uiso 1 1 calc R . . 
H33B H -0.0332 0.3888 0.1589 0.059 Uiso 1 1 calc R . . 
H33C H -0.0466 0.3216 0.2139 0.059 Uiso 1 1 calc R . . 
C34 C 0.1231(8) 0.3173(6) 0.0758(5) 0.037(3) Uani 1 1 d . . . 
H34A H 0.1859 0.2888 0.0683 0.055 Uiso 1 1 calc R . . 
H34B H 0.1363 0.3731 0.0736 0.055 Uiso 1 1 calc R . . 
H34C H 0.0544 0.3033 0.0365 0.055 Uiso 1 1 calc R . . 
C35 C 0.9081(9) 0.4615(7) 0.4548(5) 0.041(3) Uani 1 1 d . . . 
H35 H 0.8454 0.4346 0.4233 0.049 Uiso 1 1 calc R . . 
C36 C 1.0079(11) 0.4215(7) 0.4893(6) 0.046(3) Uani 1 1 d . . . 
H36 H 1.0124 0.3674 0.4819 0.056 Uiso 1 1 calc R . . 
C37 C 0.9016(9) 0.5391(7) 0.4666(6) 0.044(3) Uani 1 1 d . . . 
H37 H 0.8339 0.5659 0.4440 0.052 Uiso 1 1 calc R . . 
  
loop_ 
 _atom_site_aniso_label 
 _atom_site_aniso_U_11 
 _atom_site_aniso_U_22 
 _atom_site_aniso_U_33 
 _atom_site_aniso_U_23 
 _atom_site_aniso_U_13 
 _atom_site_aniso_U_12 
Ni1 0.0280(7) 0.0189(7) 0.0294(7) -0.0006(5) 0.0127(5) 0.0005(6) 
Br1 0.0445(7) 0.0278(7) 0.0554(7) -0.0083(5) 0.0205(5) 0.0044(5) 
Si1 0.0347(17) 0.0213(16) 0.0297(14) 0.0038(12) 0.0122(13) -0.0020(12) 
Si2 0.0283(15) 0.0247(17) 0.0324(15) -0.0004(12) 0.0120(13) -0.0013(12) 
N1 0.024(4) 0.011(4) 0.030(4) -0.003(3) 0.010(4) 0.000(3) 
N2 0.034(5) 0.016(5) 0.032(4) -0.007(4) 0.017(4) -0.006(4) 
C1 0.038(6) 0.014(5) 0.029(5) -0.010(4) 0.027(5) -0.008(4) 
C2 0.041(6) 0.006(5) 0.040(6) -0.006(4) 0.026(5) 0.003(5) 
C3 0.035(6) 0.031(6) 0.015(5) -0.002(4) 0.006(4) 0.002(5) 
C4 0.033(6) 0.016(6) 0.033(5) 0.002(4) 0.010(5) -0.004(4) 
C5 0.021(5) 0.012(5) 0.030(5) -0.011(4) 0.006(4) -0.002(4) 
C6 0.045(7) 0.020(6) 0.049(7) 0.001(5) 0.022(6) 0.008(5) 
C7 0.037(6) 0.029(6) 0.039(6) -0.002(5) 0.017(5) 0.005(5) 
C8 0.028(5) 0.015(5) 0.029(5) 0.000(4) 0.015(4) 0.004(4) 
C9 0.040(6) 0.032(7) 0.045(6) -0.004(5) 0.020(5) -0.012(5) 
C10 0.030(6) 0.027(6) 0.056(7) 0.001(5) 0.012(5) 0.011(5) 
C11 0.046(7) 0.032(7) 0.042(6) 0.000(5) 0.019(5) -0.001(5) 
C12 0.039(6) 0.030(7) 0.029(5) 0.004(5) 0.010(5) 0.005(5) 
C13 0.070(8) 0.014(6) 0.029(5) 0.002(4) 0.018(5) 0.014(5) 
C14 0.041(6) 0.037(7) 0.032(5) 0.000(5) 0.011(5) -0.002(5) 
C15 0.034(6) 0.013(5) 0.030(5) 0.001(4) 0.015(5) -0.001(4) 
C16 0.032(6) 0.014(6) 0.038(6) -0.004(4) 0.014(5) -0.005(4) 
C17 0.044(6) 0.007(5) 0.027(5) -0.002(4) 0.018(5) -0.010(4) 
C18 0.046(6) 0.024(6) 0.029(5) -0.004(4) 0.023(5) -0.005(5) 
C19 0.032(6) 0.025(6) 0.028(5) 0.005(4) 0.016(5) 0.010(4) 
C20 0.024(5) 0.017(6) 0.040(6) 0.007(4) 0.013(5) 0.004(4) 
C21 0.028(6) 0.030(6) 0.030(5) 0.000(4) 0.017(5) 0.005(4) 
C22 0.040(6) 0.015(6) 0.039(6) 0.004(4) 0.000(5) 0.000(5) 
C23 0.034(6) 0.025(6) 0.023(5) -0.010(4) -0.007(5) 0.007(4) 
C24 0.064(8) 0.045(7) 0.041(6) -0.012(5) 0.037(6) -0.014(6) 
C25 0.025(6) 0.026(6) 0.028(5) -0.003(4) 0.008(5) 0.009(4) 
C26 0.046(7) 0.027(6) 0.021(5) 0.003(4) 0.006(5) -0.004(5) 
C27 0.042(7) 0.047(7) 0.038(6) -0.008(5) 0.021(5) -0.015(5) 
C28 0.027(5) 0.014(5) 0.027(5) 0.002(4) 0.011(4) 0.001(4) 
C29 0.037(6) 0.027(6) 0.038(6) -0.007(5) 0.016(5) 0.011(5) 
C30 0.056(7) 0.021(6) 0.033(6) 0.003(5) 0.012(5) 0.002(5) 
C31 0.041(6) 0.053(7) 0.034(6) -0.006(5) 0.028(5) -0.014(5) 
C32 0.045(6) 0.014(6) 0.045(6) -0.001(5) 0.016(5) -0.007(5) 
C33 0.023(6) 0.043(7) 0.049(6) -0.003(5) 0.009(5) 0.003(5) 
C34 0.039(6) 0.030(6) 0.035(6) 0.004(5) 0.001(5) -0.006(5) 
C35 0.036(7) 0.064(9) 0.024(6) 0.002(6) 0.012(5) -0.012(6) 
C36 0.073(9) 0.046(8) 0.026(6) -0.001(5) 0.024(6) -0.014(7) 
C37 0.043(7) 0.048(8) 0.042(7) 0.011(6) 0.016(6) 0.009(6) 
  
_geom_special_details 
; 
 All esds (except the esd in the dihedral angle between two l.s. planes) 
 are estimated using the full covariance matrix.  The cell esds are taken 
 into account individually in the estimation of esds in distances, angles 
 and torsion angles; correlations between esds in cell parameters are only 
 used when they are defined by crystal symmetry.  An approximate (isotropic) 
 treatment of cell esds is used for estimating esds involving l.s. planes. 
; 
  
loop_ 
 _geom_bond_atom_site_label_1 
 _geom_bond_atom_site_label_2 
 _geom_bond_distance 
 _geom_bond_site_symmetry_2 
 _geom_bond_publ_flag 
Ni1 C1 1.827(8) . ? 
Ni1 C28 1.902(8) . ? 
Ni1 Br1 2.2449(16) . ? 
Si1 C30 1.831(9) . ? 
Si1 C31 1.842(9) . ? 
Si1 C29 1.857(9) . ? 
Si1 C28 1.862(8) . ? 
Si2 C32 1.818(9) . ? 
Si2 C34 1.843(9) . ? 
Si2 C28 1.849(9) . ? 
Si2 C33 1.868(9) . ? 
N1 C1 1.334(10) . ? 
N1 C2 1.385(11) . ? 
N1 C16 1.438(11) . ? 
N2 C3 1.369(11) . ? 
N2 C1 1.375(11) . ? 
N2 C5 1.419(11) . ? 
C2 C3 1.308(12) . ? 
C4 C7 1.375(12) . ? 
C4 C5 1.409(12) . ? 
C4 C12 1.492(12) . ? 
C5 C15 1.379(11) . ? 
C6 C10 1.352(13) . ? 
C6 C15 1.376(12) . ? 
C7 C10 1.361(12) . ? 
C8 C15 1.482(11) . ? 
C8 C11 1.508(12) . ? 
C8 C9 1.526(12) . ? 
C12 C14 1.499(12) . ? 
C12 C13 1.522(12) . ? 
C16 C20 1.380(12) . ? 
C16 C17 1.393(11) . ? 
C17 C26 1.373(12) . ? 
C17 C18 1.475(12) . ? 
C18 C27 1.508(12) . ? 
C18 C24 1.513(12) . ? 
C19 C20 1.504(12) . ? 
C19 C21 1.516(12) . ? 
C19 C23 1.530(12) . ? 
C20 C25 1.370(11) . ? 
C22 C26 1.356(13) . ? 
C22 C25 1.365(12) . ? 
C35 C37 1.337(15) . ? 
C35 C36 1.378(14) . ? 
C36 C37 1.340(14) 3_766 ? 
C37 C36 1.340(14) 3_766 ? 
  
loop_ 
 _geom_angle_atom_site_label_1 
 _geom_angle_atom_site_label_2 
 _geom_angle_atom_site_label_3 
 _geom_angle 
 _geom_angle_site_symmetry_1 
 _geom_angle_site_symmetry_3 
 _geom_angle_publ_flag 
C1 Ni1 C28 93.4(4) . . ? 
C1 Ni1 Br1 141.3(3) . . ? 
C28 Ni1 Br1 125.1(3) . . ? 
C30 Si1 C31 107.5(5) . . ? 
C30 Si1 C29 111.6(4) . . ? 
C31 Si1 C29 103.0(4) . . ? 
C30 Si1 C28 111.0(4) . . ? 
C31 Si1 C28 112.4(4) . . ? 
C29 Si1 C28 111.1(4) . . ? 
C32 Si2 C34 107.8(4) . . ? 
C32 Si2 C28 112.1(4) . . ? 
C34 Si2 C28 114.5(4) . . ? 
C32 Si2 C33 110.6(5) . . ? 
C34 Si2 C33 104.3(4) . . ? 
C28 Si2 C33 107.2(4) . . ? 
C1 N1 C2 111.0(7) . . ? 
C1 N1 C16 126.1(8) . . ? 
C2 N1 C16 121.7(7) . . ? 
C3 N2 C1 108.5(7) . . ? 
C3 N2 C5 125.0(8) . . ? 
C1 N2 C5 123.6(7) . . ? 
N1 C1 N2 104.9(7) . . ? 
N1 C1 Ni1 133.8(7) . . ? 
N2 C1 Ni1 121.0(7) . . ? 
C3 C2 N1 106.1(8) . . ? 
C2 C3 N2 109.4(8) . . ? 
C7 C4 C5 117.2(9) . . ? 
C7 C4 C12 121.9(8) . . ? 
C5 C4 C12 120.9(8) . . ? 
C15 C5 C4 121.6(8) . . ? 
C15 C5 N2 118.6(8) . . ? 
C4 C5 N2 119.6(8) . . ? 
C10 C6 C15 120.7(9) . . ? 
C10 C7 C4 120.7(9) . . ? 
C15 C8 C11 112.8(8) . . ? 
C15 C8 C9 110.5(8) . . ? 
C11 C8 C9 109.9(7) . . ? 
C6 C10 C7 121.4(9) . . ? 
C4 C12 C14 114.8(8) . . ? 
C4 C12 C13 111.2(8) . . ? 
C14 C12 C13 108.6(7) . . ? 
C6 C15 C5 118.1(8) . . ? 
C6 C15 C8 119.3(8) . . ? 
C5 C15 C8 122.6(8) . . ? 
C20 C16 C17 122.6(9) . . ? 
C20 C16 N1 118.1(8) . . ? 
C17 C16 N1 119.2(8) . . ? 
C26 C17 C16 116.7(8) . . ? 
C26 C17 C18 121.0(8) . . ? 
C16 C17 C18 122.1(9) . . ? 
C17 C18 C27 112.2(8) . . ? 
C17 C18 C24 114.1(8) . . ? 
C27 C18 C24 109.5(8) . . ? 
C20 C19 C21 112.9(8) . . ? 
C20 C19 C23 109.4(7) . . ? 
C21 C19 C23 111.0(7) . . ? 
C25 C20 C16 118.0(8) . . ? 
C25 C20 C19 118.2(8) . . ? 
C16 C20 C19 123.6(8) . . ? 
C26 C22 C25 120.8(9) . . ? 
C22 C25 C20 120.3(9) . . ? 
C22 C26 C17 121.5(9) . . ? 
Si2 C28 Si1 117.7(5) . . ? 
Si2 C28 Ni1 104.8(4) . . ? 
Si1 C28 Ni1 108.7(4) . . ? 
C37 C35 C36 119.8(10) . . ? 
C37 C36 C35 119.8(11) 3_766 . ? 
C35 C37 C36 120.4(11) . 3_766 ? 
  
_diffrn_measured_fraction_theta_max    0.964 
_diffrn_reflns_theta_full              25.49 
_diffrn_measured_fraction_theta_full   0.964 
_refine_diff_density_max    1.011 
_refine_diff_density_min   -0.619 
_refine_diff_density_rms    0.121 
